# Supplementary material for: Target identification of mouse stem cell probe CDy1 as ALDH2 and Abcb1b through live-cell affinity-matrix and ABC CRISPRa library
Source: Royal Society of Chemistry journal article supplement (doi:10.1039/d1cb00147g), 2021-01-01
Supplement: d1cb00147g1.pdf [file d1cb00147g1.pdf]

## Target identification of mouse stem cell probe CDy1 as ALDH2 and Abcb1b through live-cell affinity-matrix and ABC CRISPRa library

Naoki Miyamoto<sup>†a</sup>, Young-Hyun Go<sup>†b</sup>, Larissa Miasiro Ciaramicoli<sup>†c</sup>, Haw-Young Kwon<sup>a</sup>, Heon Seok Kim<sup>d</sup>, Xuezhi Bi<sup>e</sup>, Young Hyun Yu<sup>f</sup>, Beomsue Kim<sup>g</sup>, Hyung-Ho Ha<sup>f</sup>, Nam-Young Kang<sup>h</sup>, Seong-Wook Yun<sup>i</sup>, Jin-Soo Kim<sup>j,k</sup>, Hyuk-Jin Cha<sup>\*l</sup>, and Young-Tae Chang <sup>\*a,c</sup>

- a. Center for Self-assembly and Complexity, Institute for Basic Science (IBS), Pohang 37673, Republic of Korea. E-mail: ytchang@postech.ac.kr
- b. Department of Life Science, Sogang University, 35 Baekbeom-ro, Mapo-gu, Seoul 04107, South Korea
- c. Department of Chemistry, Pohang University of Science and Technology (POSTECH), Pohang, Gyeongbuk 37673, Republic of Korea
- d. Division of Oncology, Department of Medicine, Stanford University School of Medicine, Stanford, CA, USA
- e. Bioprocessing Technology Institute, Agency for Science, Technology and Research (A\*STAR), Singapore 138668, Singapore
- f. College of Pharmacy, Suncheon National University, Jungangro 255, Suncheon 57922, South Korea
- g. Neural Circuit Research Group, Korea Brain Research Institute (KBRI), Daegu, 41068, Republic of Korea
- h. Department of Convergence IT Engineering, Pohang University of Science and Technology, Pohang, Gyeongbuk 37673, Korea
- i. Nonclinical Drug Safety, Boehringer Ingelheim Pharma GmbH & Co. KG, 88397 Biberach an der Riss, Germany
- j. Department of Chemistry, Seoul National University, Seoul 08826, Republic of Korea
- k. Center for Genome Engineering, Institute for Basic Science (IBS), Daejeon 34126, Republic of Korea
- l. College of Pharmacy, Seoul National University, Seoul, 08826, Republic of Korea

**Correspondence Email: ytchang@postech.ac.kr**

**hjcha93@snu.ac.kr**

## Contents

- Experimental
- Fig. S1: MALDI-TOF/TOF spectra for CDy1CA-positive spots on 2D gel electrophoresis.
- Fig. S2: CDy1 vs. CDy1CA competition assay.
- Fig. S3: Expression of ALDH gene family in mESC and MEF.
- Fig. S4: CDy1CA binding inhibition by ALDH inhibitor disulfiram.
- Fig. S5: CDy1 staining pattern in mESC and MEF.
- Fig. S6: Abcb1b expression level.
- Fig. S7: Verapamil treatment with CDy1 staining on MEF.
- Fig. S8: Verapamil or cyclosporine A treatment with CDy1 staining on MEF.
- Fig. S9: CDy1 signal of MEF treated with siRNAs targeting Abcb1b.
- Table S1: The list of sgRNAs targeting ABC transporter genes.

## **Experimental**

### **Cell Culture**

mESC (J1 cell line) and MEF (NIH3T3 cell line) were purchased from the American Tissue Culture Collection (ATCC, VA, USA). mESC was cultured in a culture dish coated with 0.1% gelatin using a high-glucose Dulbecco's Modified Eagle's medium (DMEM) supplemented with 10% fetal calf serum, 2 mM L-glutamine, 100 U/ml penicillin, 100 µg/ml streptomycin, 0.1 mM non-essential amino acids, 0.1% β-mercaptoethanol and 100 U/ml leukemia inhibitory factor (LIF, Chemicon). MEF was maintained in the same media as used for mESC without LIF and treated with mitomycin C (10 µg/ml) before used as feeder cell.

### **Image-based cell screening**

MEFs were plated on 0.1% gelatin-coated 384-well cell culture microplates (Greiner bio-one, Germany). On the next day, mESCs were plated both on MEF feeder and feeder-free wells for overnight culture and then incubated with 500 nM of rosamine fluorescent compounds. After 0.5 h, 24 h and 48 h, TRITC fluorescence and bright field images were taken using ImageXpressMICRO imaging system (Molecular Devices).

### **Flow cytometry to analyze CDy1CA signal on mESC and MEF**

MEFs and mESCs were cultured in 60 mm culture dish for 24 h in the presence of 500 nM of hit compounds including CDy1 or 2 µM CDy1CA. The cells were harvested by trypsin treatment, washed with PBS and resuspended in PBS. The fluorescence intensity of the cells was measured on Flow Cytometry (BDTM LSR II) with PE-Texas Red filter (excitation at 488 nm, emission at 615 nm). The dot plot images for each cell type were overlaid using FlowJo7 (Three Star Inc.).

### **Target protein identification by 2DE-MALDI-TOF-TOF**

Protein Extraction – mESCs incubated with 2 µM of CDy1CA for 24 h were trypsinized and washed three times with cold PBS. The cell pellet was resuspended in a lysis buffer (40 mM Trizma, 7 M Urea, 2 M thiourea and 4% CHAPS (Sigma) premixed with 10 µl/ml Protease Inhibitor Cocktail (EDTA free, GE healthcare) and 50 µg/ml DNase I and 50 µg/ml RNase A (Roche). The cell extract was homogenized by vortexing followed by ultrasonication on ice for 10 second, and incubated for 30 min at room temperature. The supernatant was collected after centrifugation at 20,000 x g for 45 min at 10°C and protein concentration was determined by Bradford protein assay reagent (Bio-Rad).

Two-dimensional gel electrophoresis (2-DE) – Isoelectric focusing (IEF) was performed using

PROTEAN IEF Cell (Bio-Rad) with 18 cm ReadyStrip pH 3-10NL (Bio-Rad). The sample of 1 mg protein was diluted into 340  $\mu$ l of rehydration buffer (7 M urea, 2 M thiourea, 4% CHAPS, 20 mM DTT, 0.5% IPG buffer pH 3-10 NL (GE healthcare), and loaded to each IPG strip with passive rehydration and focused for 60,000 Vhrs at 20°C. The IEF strips were reduced in equilibration buffer I (50 mM Tris-HCl, pH 8.8, 6 M urea, 30% glycerol, 2% SDS, 2% DTT) for 10 min and alkylated with SDS-PAGE Equilibration Buffer II (50 mM Tris-HCl, pH 8.8, 6 M urea, 30% glycerol, 2% SDS, 2.5% iodoacetamide, and a trace of bromophenol blue) for an additional 10 min. The equilibrated IEF strips were embedded in 0.5% agarose in 1x Tris-glycine-SDS buffer on top of a second dimension SDS-PAGE (12%) gel. After electrophoresis for 5 h at 30 mA, the 2D fluorescence image was acquired using the Typhoon 9400 scanner (GE healthcares) at excitation/emission wavelengths of 532 nm/580 nm with PMT at 500V. The fluorescence labeled protein spots were directly excised from the gel. After spot cutting, the gel rescanned again confirming the labeled protein were accurately removed and stained with 0.1% Coomassie brilliant blue R250 in 50% methanol, 10% acetic acid in water.

Trypsin digestion and MALDI-TOF/TOF MS and MS/MS analyses – Fluorescent spots excised from the gel were washed with Mili-Q water and cut into 1 mm<sup>3</sup> in size, then incubated with 200  $\mu$ l of 50% acetonitrile/25 mM ammonium bicarbonate buffer, pH7.8 for 3 times and dehydrated in 100% acetonitrile. The gel pieces were rehydrated with 10 ng/ $\mu$ l trypsin gold, Mass Spectrometry grade (Promega) in 25 mM ammonium bicarbonate buffer, pH 8.0, overlaid with 10  $\mu$ l of 25 mM ammonium bicarbonate buffer, and digested for 16 h at 37°C. The peptides were extracted sequentially with 20 mM ammonium bicarbonate buffer followed by 50% acetonitrile in 0.1% TFA. The pooled peptides were speed-vac dried and dissolved in 4  $\mu$ l 0.1% TFA. Tryptic peptide (0.5  $\mu$ l) was spotted onto Prespotted AnchorChip target plate (Bruker Daltonics) according to manufacturer's protocol. The peptide mass fingerprint and lift MS/MS of selected precursors were acquired in UltraFlex III TOF-TOF (Bruker Daltonics) with the compass 1.2 software package including flexControl 3.0 and flexAnalysis 3.0 with PAC peptide calibration standards. The peak list was submitted to in-house Mascot server 2.2 ([http://phenyx.bii.a-star.edu.sg/search\\_form\\_select.html](http://phenyx.bii.a-star.edu.sg/search_form_select.html)) through BioTools 3.1 (Bruker Daltonics) with the database of IPI-mouse containing 56692 sequences with peptide mass tolerance of 100 ppm with maximum 1 missed cleavage, considering of variable modifications of carbamidomethyl at cysteine (C) and Oxidation at methionine (M).

#### **ALDH2 knock down using shRNA**

mESC was directly infected with  $1 \times 10^5$  infectious units of virus (IFU) of shRNA lentiviral particles prepared in complete medium containing 10  $\mu$ g/mL of Polybrene. shRNA was carried out in suspension with scrambled control or ALDH2 shRNA lentiviral particles (Santa Cruz Biotechnology) in a 6-well cell culture plate. The infected mESCs were seeded at a density of  $1.5 \times 10^5$ /well on a gelatin-

coated 6-well plate. On the next day, the culture medium was replaced with complete medium and the cells were incubated for overnight before infected cell selection using Puromycin dihydrochloride at a concentration 10 µg/mL. The cells were split 1:3 and the medium with Puromycin was replaced every 3-4 days until resistant colonies were identified.

### **Western blotting**

Protein samples prepared by same method as described in the section Target protein identification by 2DE-MALDI-TOF-TOF were subjected to an SDS-PAGE and transferred to PVDF membrane (Bio-Rad). The membranes were incubated with PBS containing 5% (w/v) nonfat dry milk and 0.05% Tween-20 for 1 h at room temperature and then K15 goat-anti-human ALDH2 (dilution 1:500, Santa Cruz Biotechnology) was added for overnight incubation at 4°C. The antibody-antigen complex was detected by incubation with donkey anti-goat IgG-PE-Cy5 secondary antibody (Santa Cruz Biotechnology) prepared in PBS containing 1% BSA, and the membrane was scanned using Typhoon 9400 scanner (GE healthcare).

### **CDy1 vs CDy1CA competition assay**

Free compound, CDy1 was pre-incubated with mESCs at concentrations of 0, 5, 15 and 30 µM for 1 h and 2 µM of CDy1CA was added for 30 min incubation. Total cell lysates were prepared in a lysis buffer described in the section Target protein identification by 2DE-MALDI-TOF-TOF. Equal amounts of protein from each sample were subjected to an SDS-PAGE. The fluorescent signal of CDy1CA was visualized using Typhoon 9400 scanner (GE healthcare).

### **DNA microarray analysis**

Total RNA was isolated using RNeasy Mini Kit (QIAGEN Inc.) from MEF and mESC. Each sample was converted to biotinylated cRNA using Illumina RNA Amplification Kit (Ambion Inc.) according to the manufacturer's instructions. The cRNA was purified and hybridized to the MouseRef-8 v2.0 Expression BeadChip. Arrays were scanned with iScan Scanner System (Illumina Inc.). Data analyzed by using GenePlex v 3.0 software (ISTECH Inc.). Using GenePlex Preprocessing module, global median normalization procedures were applied, and genes with "present" flag value in all samples were used for DEG (Differentially expressed gene) finding analysis.

### **RT-PCR for ALDH2 and ALDH1a1 on mESC and MEF**

Total RNA was isolated using RNeasy Mini Kit (QIAGEN) from cells according to the manufacturer's instruction. cDNA was synthesized from 1 µg of total RNA using RevertAid™ H Minus First strand cDNA Synthesis kit (Fermentas) and amplified by PCR using GoTaq® Green Master Mix (Promega). The PCR condition was as follows: 30 s denaturation at 95°C, 30 s annealing at 60°C, and a final 30 s

of extension at 72°C. The sequences of primers used in this study are: ALDH1a1 (access no. NM\_013467.3): sense 5'-GCACTCAATGGTGGGAAAGT-3', antisense 5'-CCATGGTGTGCAAAC-3'; ALDH2 (access no. NM\_009656.3): sense: 5'-AGGCGAGGACTTGTCTTCA-3', antisense: 5'-CGGAGACATTCAGGACCAT-3'; GAPDH (access no. XM\_001473443.1): sense 5'-GCACAGTCAAGCCGAGAAT-3', antisense 5'-GCCTTCTCCATGGTGGTGAA-3' and Nanog (access no. NM\_028016.1): sense 5'-AGGGTCTGCTACTGAGATGCTCTG-3', antisense 5'-CAACCACTGGTTTTCTGCCACCG-3'. The PCR products obtained after 25 cycles were resolved on 1% agarose gels, visualize by ethidium bromide staining and the images were taken using Gel Logic 200 Imaging System (Kodak).

### **ALDH2 knock down using siRNA**

mESC was directly transfected with 30 nM of siRNA duplexes prepared in 7.5 µL of Lipofectamine RNAiMAX reagent (Invitrogen) according to the manufacturer's instructions. siRNA transfection was carried out in suspension with scrambled control and ALDH2 siRNA (Santa Cruz Biotechnology) duplex in a 6-well cell culture plate. The transfected mESCs were seeded at a density of 1.5 x 10<sup>5</sup>/well on a gelatin-coated 6-well plate. The cells were collected 72 h later.

### **Disulfiram inhibition of CDy1CA binding**

Disulfiram was pre-incubated with mESCs at concentrations of 0, 3, 10, 30 and 50 µM for 1 h and 2 µM of CDy1CA was added for 30 min incubation. The samples were processed for visualization as described in the section CDy1 vs CDy1CA competition assay.

### **ABC-CRISPR activation Screen**

The construction protocol of CRISPRa library cell for transporters was described before.<sup>7</sup> 1.5x10<sup>6</sup> of the library cells were cultured in 10 cm culture plate for 3 days. Then, the cells were incubated in DMEM including 100 nM CDy1 for 30 min. After washing the cells with PBS for three times, cells were detached with trypsin. Collected cells were analyzed and their live single cells were sorted with gating of 10% dim population in fluorescence intensity (FL2) on S3e Cell Sorter (BioRad). Sorted dim population was cultured and expanded for next round. Analysis of CDy1 signal on sorted cells (staining condition was same with above) was performed on Moflo XDP (Beckman coulter) with PE-filter. The FCS data was analyzed on FlowJo 10.4.2 software.

### **NGS analysis of integrated sgrNAs in enriched cells**

Genomic DNA was isolated from library cells and round-3 enriched cells with QIAamp® DNA Mini Kit (QIAGEN) according to the manufacturer's protocol. NGS protocol was described before.<sup>7</sup>

#### **RT-PCR for Abcb1b on mESC and MEF**

Abcb1 and Sox2 mRNA expression levels on mESC and MEF were analyzed with each primers (mAbcb1b forward: 5'-ATGGATCCCAGAGTGACT-3', mAbcb1b reverse: 5'-CTTTCTGTGGACTTCTG-3', mSox2 forward: 5'-ATGGGCTCTGTGGTCAAGTC-3', mSox2 reverse: 5'-CCCTCCAATTCCTTGTAT-3) on RT-PCR procedures described above.

#### **Flow cytometry to analyze CDy1 staining pattern on mESC and MEF**

mESC and MEF were fixed under 4% PFA condition for 10 min. Then, fixed and unfixed cells were incubated with 50 nM CDy1 for 1 h. After washing cells with PBS for three times, CDy1 signal was analyzed on flow cytometry with FL-2 filter.

#### **Inhibitors study against Abcb1b on mESC and MEF**

mESC and MEF were cultured under verapamil (50, 25, 12.5, 6.25 or 3.125  $\mu$ M) or cyclosporine A (10, 5, 2.5 or 1.25  $\mu$ M) for overnight (DMSO was utilized as no inhibitor condition.). Then, these cells were incubated with 50 nM CDy1 for 1 h. After washing cells with PBS for three times, CDy1 signal was analyzed on flow cytometry with FL-2 filter or imaged on microscope.

#### **Abcb1b knock down using siRNA**

MEF were transfected with 20  $\mu$ M of siRNAs with Dharmafect for 48 h. After transfection, these cells were incubated with 50 nM CDy1 for 1 h. The cells were washed with PBS for three times, and then CDy1 signal was analyzed on flow cytometry with FL-2 filter or imaged on microscope. Abcb1b mRNA expression level was analyzed on the same procedure with above.

## Supplementary Figures

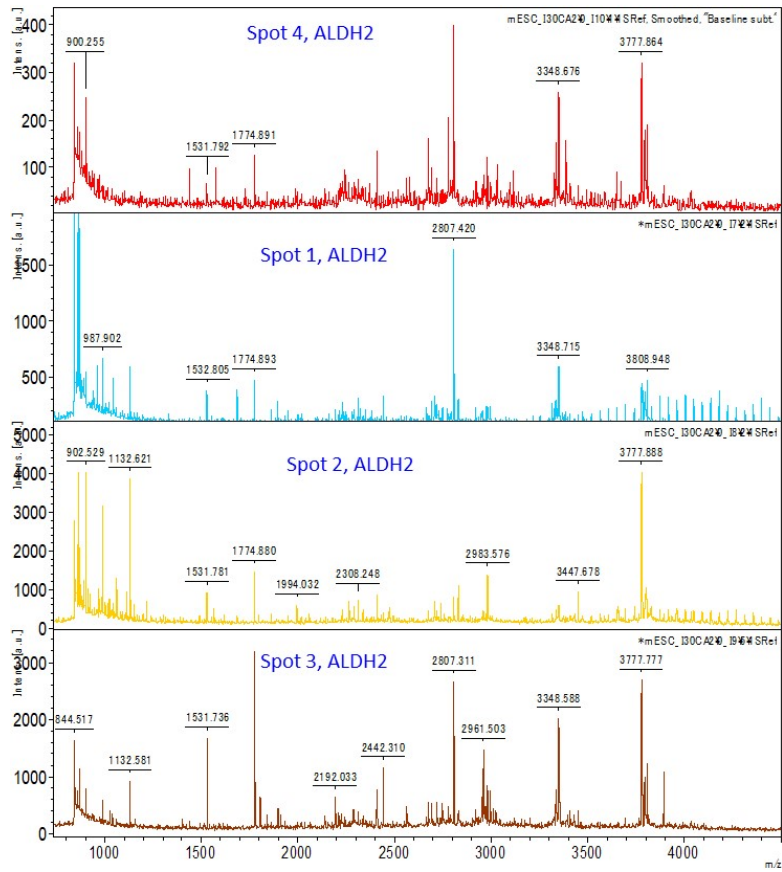

**Fig. S1 MALDI-TOF MS spectra of tryptic digested peptides for CDy1CA-positive spots on 2D gel electrophoresis.** Each spots are shown in Fig. 1D. Horizontal axis is m/z value and vertical axis is the intensity of peptide ions. All of the four protein spots were identified as ALDH2 by mascot database search using tryptic peptide mass fingerprint and selected precursor LIFT MS/MS fragment ions.



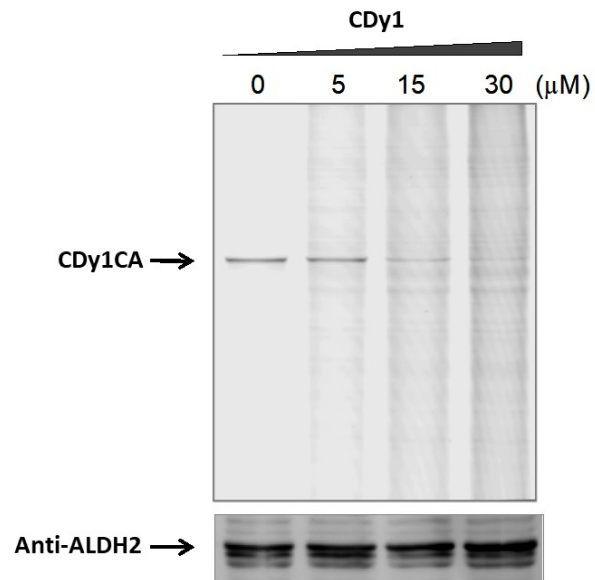

**Fig. S2 CDy1 vs. CDy1CA competition assay.** Upper panel: fluorescent SDS-PAGE gel image showed CDy1CA binding to its target protein was inhibited by CDy1. Lower panel: Western blotting showed ALDH2 levels in the protein samples were similar.

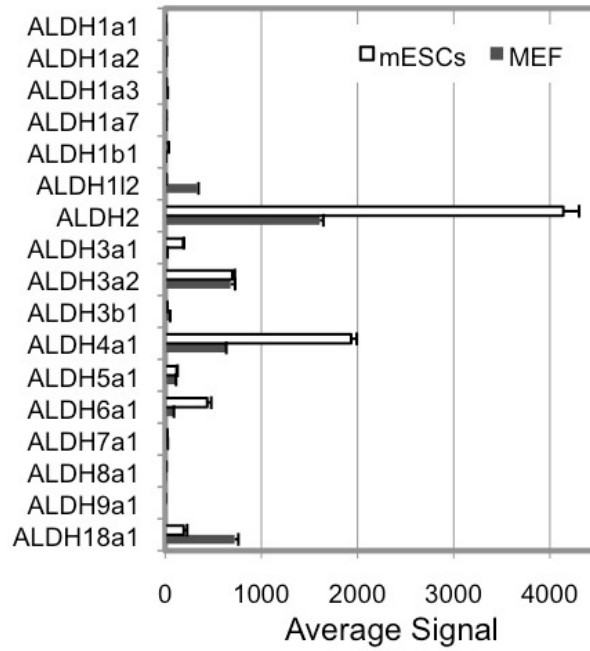

**Fig. S3 Expression of ALDH gene family in mESC and MEF.** Higher expression of ALDH2 in mESC than in MEF was demonstrated by DNA microarray

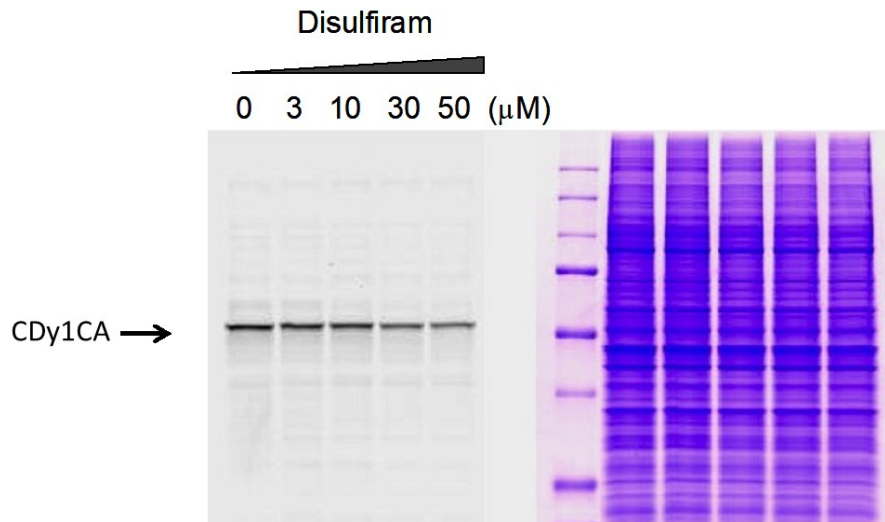

**Fig. S4 CDy1CA binding inhibition by ALDH inhibitor disulfiram.** The cells were preincubated with different concentrations of disulfiram followed by CDy1CA staining. Left panel: the SDS-PAGE shows CDy1CA binding to its target protein in inhibited by disulfiram in concentration dependent manner, right panel: the same gel was stained with Coomassie brilliant blue to assess the amount of loaded protein.

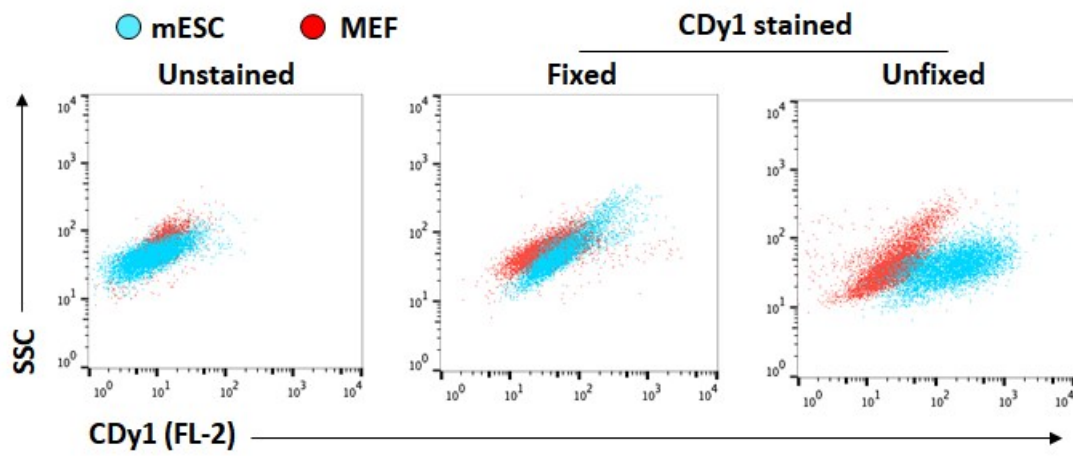

**Fig. S5 CDy1 staining pattern in mESC and MEF.** CDy1 staining pattern on mESC and MEF was tested in fixed or unfixed condition. In fixed condition, both cells showed similar CDy1 signal compared with unstained condition's. However, MEF, expressing *Abcb1b* more highly than mESC, showed less CDy1 signal than mESC at unfixed condition (live cell condition).

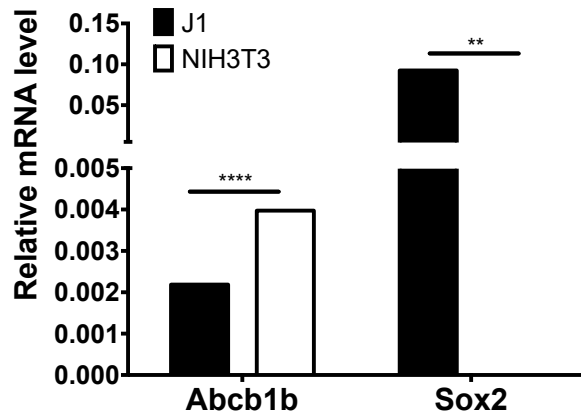

**Fig. S6 Abcb1b expression level.** mRNAs expression level of Abcb1b and Sox2, stem cell marker, were compared in mESC and MEF.

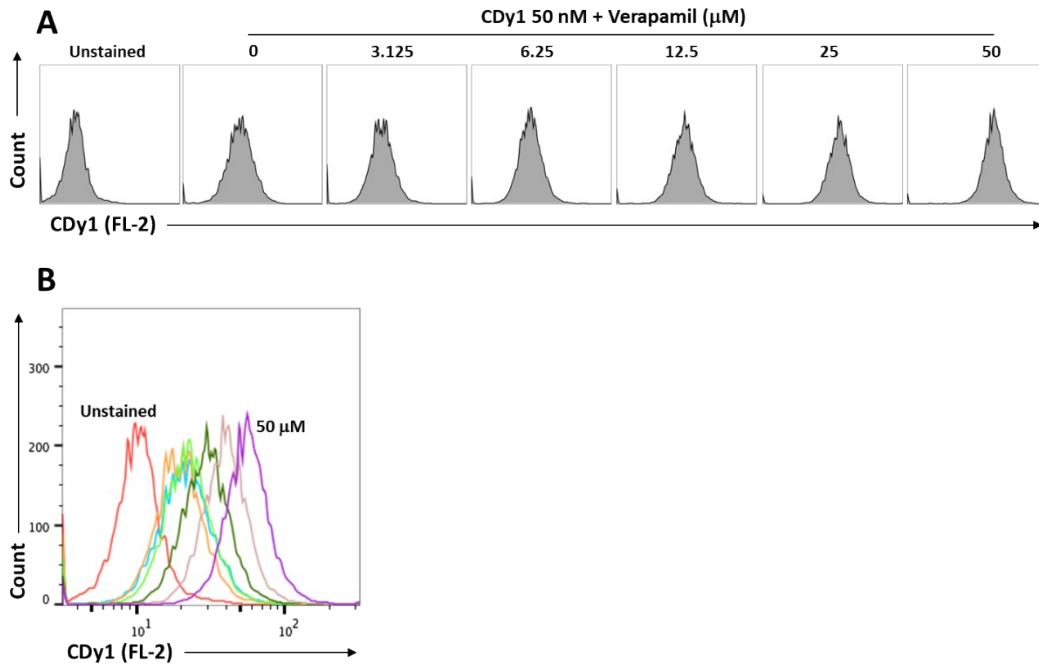

**Fig. S7 Verapamil treatment with CDy1 staining on MEF.** (A) MEF was incubated with DMSO or verapamil, an ABCB1 inhibitor, at 3.125, 6.25, 12.5, 25 or 50  $\mu\text{M}$  for 16 hours. After staining cells with 50 nM CDy1 for 1 hour, and washing them with PBS, CDy1 intensity was analyzed on FACS. Dependent on verapamil concentration, CDy1 signal was increased. (B) Overwriting histograms of (A). Red histogram means unstained cells, cyan histogram means 50 nM CDy1 without verapamil condition, orange histogram means 50 nM CDy1 with 3.125  $\mu\text{M}$  verapamil condition, light green histogram means 50 nM CDy1 with 6.25  $\mu\text{M}$  verapamil condition, dark green histogram means 50 nM CDy1 with 12.5  $\mu\text{M}$  verapamil condition, light purple histogram means 50 nM CDy1 with 25  $\mu\text{M}$  verapamil condition and dark purple histogram means 50 nM CDy1 with 50  $\mu\text{M}$  verapamil.

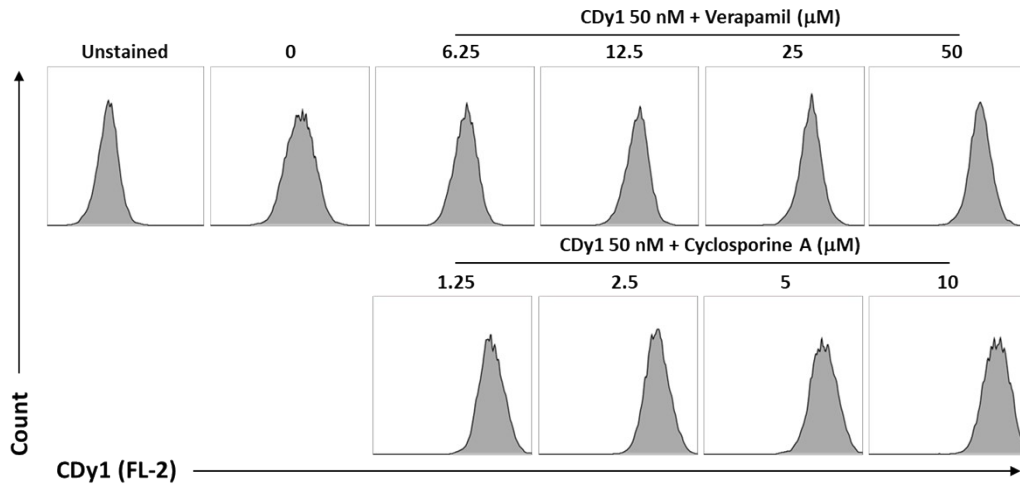

**Fig. S8 Verapamil or cyclosporine A treatment with CDy1 staining on MEF.** MEF was treated with verapamil or cyclosporine A for 24 hours. Then, the cells were stained with 50 nM CDy1 for 1 hour. After washing the cells with PBS, CDy1 signals were analyzed on flow cytometry.

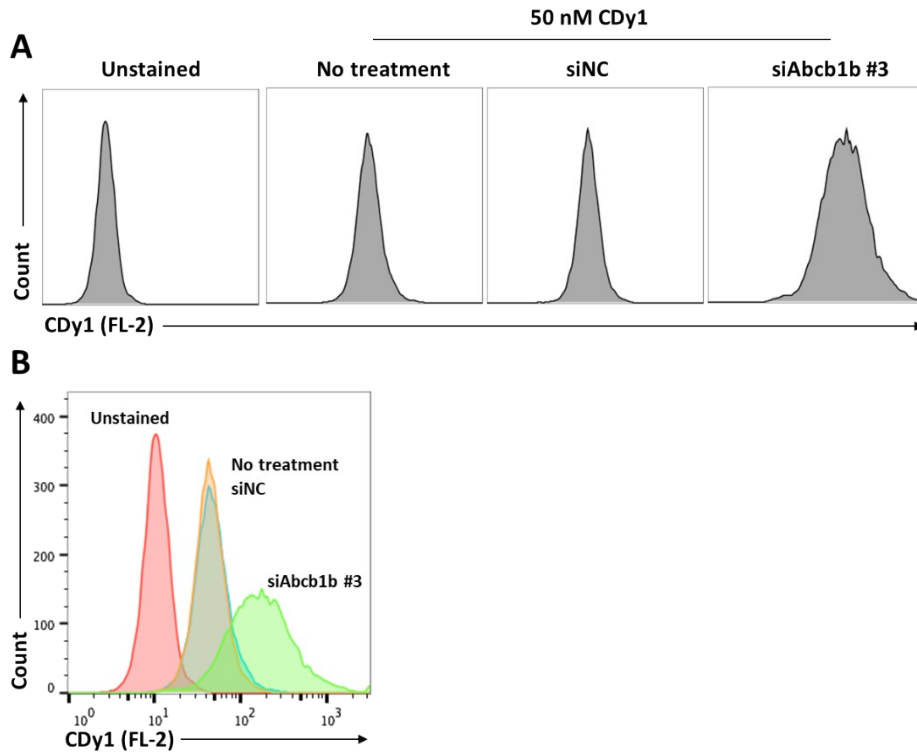

**Fig. S9 CDy1 signal of MEF treated with siRNAs targeting Abcb1b.** (A) MEF was treated with 20 nM control siRNA (siNC) or three kinds of siRNAs targeting Abcb1b (siAbcb1b) for 48 hours. Then, cells were stained with 50 nM CDy1. After washing cells with PBS, CDy1 signal was detected on flow cytometry. (B) Overwriting data of (A). Red histogram means unstained cells, orange histogram means cells untreated with siRNA, cyan histogram means siNC-treated cells and light green means siAbcb1b-treated cells.



**Table S1. The list of sgRNAs targeting ABC transporter genes**

| Gene  | Target sequence       | Count in library cell | Count in round 3-sorted cell |
|-------|-----------------------|-----------------------|------------------------------|
| ABCA1 | GACTCTCTAGTCCACGTTCC  | 67                    | 0                            |
| ABCA1 | GCAATTACGGGGTTTTTGCC  | 197                   | 0                            |
| ABCA1 | CCGATAGTAACCTCTGCGCT  | 80                    | 0                            |
| ABCA1 | CTCCCTAGATGTGTCGTGGG  | 1                     | 0                            |
| ABCA1 | AACGTCGCCCCGTTTAAGGGG | 29                    | 0                            |
| ABCA1 | GGCTGAACGTCGCCCCGTTTA | 16                    | 0                            |
| ABCA1 | GCTGAACGTCGCCCCGTTTAA | 139                   | 0                            |
| ABCA1 | GGTGCAGCCGAATCTATAAA  | 51                    | 0                            |
| ABCA1 | AGCAGAAAGCACGTGGAGCC  | 68                    | 0                            |
| ABCA1 | CTGAACGTCGCCCCGTTTAAG | 102                   | 0                            |
| ABCA2 | CCACATCGAATCCGAGACCC  | 29                    | 0                            |
| ABCA2 | CGGGGTCTCGGATTCGATGT  | 0                     | 0                            |
| ABCA2 | GCTCTTCTCCCAGAGGCATC  | 82                    | 0                            |
| ABCA2 | CGAAGGCTAAGCCGGGGTCT  | 21                    | 0                            |
| ABCA2 | GACCCCGGCTTAGCCTTCGT  | 42                    | 0                            |
| ABCA2 | GGCTTAGCCTTCGTAGGCCG  | 92                    | 0                            |
| ABCA2 | CCGGCTTAGCCTTCGTAGGC  | 64                    | 0                            |
| ABCA2 | GGAGCGCGGCCTTTAAGC    | 0                     | 0                            |
| ABCA2 | CGGCCTACGAAGGCTAAGCC  | 0                     | 0                            |
| ABCA2 | GCGCTGCGCTCTTCTCCCAG  | 344                   | 0                            |
| ABCA3 | CACACCCGAAACTCGACTT   | 69                    | 0                            |
| ABCA3 | ACAGAGCAGTGCGCAAGCAC  | 0                     | 0                            |
| ABCA3 | ACGGCCAAAGTCGAGTTTCC  | 74                    | 0                            |
| ABCA3 | GCAGTGGAAGTCTTCACACC  | 27                    | 0                            |
| ABCA3 | CGCAGAGTCATTCTGTGTCAG | 33                    | 0                            |
| ABCA3 | AACGGCCAAAGTCGAGTTTC  | 25                    | 0                            |
| ABCA3 | CACAGAGCAGTGCGCAAGCA  | 79                    | 0                            |
| ABCA3 | TGCCCCGCGCCTATGTCCAGC | 6                     | 0                            |
| ABCA3 | GCCCCGCGCCTATGTCCAGCA | 208                   | 0                            |
| ABCA3 | GGTGCGAACC GCGTACTCGC | 0                     | 0                            |
| ABCA4 | GTCCTTCTCCTGGTGATTAA  | 174                   | 0                            |
| ABCA4 | CTCAGGAACCCCTCTCATGG  | 0                     | 0                            |
| ABCA4 | GATCTGCCGAGTGAGTCGAT  | 38                    | 0                            |

|       |                      |     |     |
|-------|----------------------|-----|-----|
| ABCA4 | GCCAGTCAAACCTGACTGC  | 87  | 0   |
| ABCA4 | GGCACTCTCCTCCATGAGAG | 39  | 0   |
| ABCA4 | TTCCTGAGGGGGATGTCTTT | 2   | 0   |
| ABCA4 | GCACCAGGGAAATTGAGGTG | 71  | 0   |
| ABCA4 | AATGGGAAACCAAGACCCTC | 20  | 0   |
| ABCA4 | AGCCTTTAATCACCAGGAGA | 277 | 0   |
| ABCA4 | TCCATGAGAGGGGTTCTGA  | 104 | 0   |
| ABCA5 | CACGCTCTTTCTGGAGGCAC | 184 | 0   |
| ABCA5 | GGATCTCGCCACGCTCTTTC | 8   | 295 |
| ABCA5 | CCACGCTCTTTCTGGAGGCA | 80  | 0   |
| ABCA5 | TCTCGCCACGCTCTTTCTGG | 46  | 0   |
| ABCA5 | GGAGGCACGGGCAAAAACCA | 52  | 0   |
| ABCA5 | CCTCCTGCAGAGCGCACCTG | 58  | 0   |
| ABCA5 | TCTAGTGGCTCAGGGGCCCT | 0   | 0   |
| ABCA5 | AGGCCCGACTCTAGTGGCTC | 89  | 0   |
| ABCA5 | TGCAGAGCGCACCTGAGGGC | 79  | 0   |
| ABCA5 | GGCCTCGTGGCTCTTCCCCA | 268 | 0   |
| ABCA6 | GGAAATGACTGTTCCGTGGT | 31  | 0   |
| ABCA6 | TACACCCCTTTTCAGAAACC | 98  | 0   |
| ABCA6 | TCATCATGTACAGCTTGGTC | 42  | 0   |
| ABCA6 | ACACAGCCTGGTTTCTGAAA | 181 | 0   |
| ABCA6 | TGACTGTTCCGTGGTTGGTT | 97  | 0   |
| ABCA6 | GCCTTCAACTACAGGGATA  | 87  | 0   |
| ABCA6 | GCAAGGAAATGACTGTTCCG | 0   | 0   |
| ABCA6 | ATGACTGTTCCGTGGTTGGT | 35  | 0   |
| ABCA6 | AAGGGGGAAAACGGTAAACA | 63  | 0   |
| ABCA6 | TCTTGTTCTGCCTCCATCT  | 210 | 0   |
| ABCA7 | ACGAGTGTAGTCCCAGAGTC | 15  | 0   |
| ABCA7 | GGTTTCTTAAAGGGACCGCG | 47  | 0   |
| ABCA7 | GGAGGAGACGGGATCACAGA | 0   | 0   |
| ABCA7 | GGCTCTTGCTGCATCACCGT | 78  | 0   |
| ABCA7 | GCCGGTTATAACGTGGGG   | 0   | 0   |
| ABCA7 | GAACGAGGCTGCGCTGTCTT | 0   | 0   |
| ABCA7 | GGACTAACTAGAGGGAGCC  | 1   | 0   |
| ABCA7 | CAGAGGGAACCTGCAATT   | 48  | 0   |
| ABCA7 | ACTCCTGCAATTCGGAGCTG | 127 | 0   |

|        |                       |     |   |
|--------|-----------------------|-----|---|
| ABCA7  | TTGCAGCCGGTTATAACAACG | 0   | 0 |
| ABCA8  | GGCATTTATACTGGGTTGCC  | 82  | 0 |
| ABCA8  | CACATTCACGTCATCATGCT  | 51  | 0 |
| ABCA8  | CGTGAATGTGATGTTTGGCA  | 120 | 0 |
| ABCA8  | ACGTGAATGTGATGTTTGGC  | 28  | 0 |
| ABCA8  | GAAGACTGCTTTCAGAGTGG  | 63  | 0 |
| ABCA8  | TATAAATGCCACTGCTCTGC  | 20  | 0 |
| ABCA8  | CAGAGCAGTGGCATTTATAC  | 92  | 0 |
| ABCA8  | TGCCACTGCTCTGCAGGAAC  | 74  | 0 |
| ABCA8  | TGTGAAGACTGCTTTCAGAG  | 141 | 0 |
| ABCA8  | AAAATGAAGCTGGGAAGCAG  | 47  | 0 |
| ABCA9  | GAAGTGAAGCTGGGAAGCAG  | 112 | 0 |
| ABCA9  | TTCCTGCTAGTTACTCAGCA  | 214 | 0 |
| ABCA9  | TGTAGTTGCAGATGGTTGGC  | 140 | 0 |
| ABCA9  | CTCCCTGCTGAGTAACTAGC  | 24  | 0 |
| ABCA9  | AGGGAGTTTGTAGTTGCAGA  | 11  | 0 |
| ABCA9  | TTTCTGCTAGTTACTCAGC   | 120 | 0 |
| ABCA9  | TGCTCTACTTCTCTGGAT    | 270 | 0 |
| ABCA9  | TGGGGTCAACTCTCCATTA   | 210 | 0 |
| ABCA9  | TTGGGGTCAACTCTCCATT   | 107 | 0 |
| ABCA9  | GAGAAAGGCTAGATTCTCCT  | 45  | 0 |
| ABCA10 | TTACCTTTCCCTCTCTCAT   | 38  | 0 |
| ABCA10 | TCAGTGTGATAATACGGGGG  | 40  | 0 |
| ABCA10 | CAATCTCTCCTATGAGAGAG  | 0   | 0 |
| ABCA10 | TAACAAAGTGCAGGCTGAGT  | 152 | 0 |
| ABCA10 | TCTCCTATGAGAGAGGGGAA  | 39  | 0 |
| ABCA10 | ATAACAAAGTGCAGGCTGAG  | 81  | 0 |
| ABCA10 | CTCAATCTCTCCTATGAGAG  | 39  | 0 |
| ABCA10 | AATACGGGGGAGGAATTAAT  | 63  | 0 |
| ABCA10 | ATAGCACAAATAACAAAGTGC | 0   | 0 |
| ABCA10 | TCAATCTCTCCTATGAGAGA  | 43  | 0 |
| ABCA12 | TCATGGAGAGTAGGAGGTGT  | 42  | 0 |
| ABCA12 | GGACCCAGATCAGTATCTTT  | 191 | 0 |
| ABCA12 | CTGGATGCGTCACAGGGACT  | 162 | 0 |
| ABCA12 | TGGATGCGTCACAGGGACTA  | 67  | 0 |
| ABCA12 | GCCACCCAAAGATACTGATC  | 30  | 0 |

|        |                      |     |       |
|--------|----------------------|-----|-------|
| ABCA12 | AGGACCCAGATCAGTATCTT | 123 | 0     |
| ABCA12 | GATGCGTCACAGGGACTAGG | 78  | 0     |
| ABCA12 | AAGTCCTACTGGCCTTGCAA | 183 | 0     |
| ABCA12 | TTCATGGAGAGTAGGAGGTG | 89  | 0     |
| ABCA12 | ACCTGCACTGGATGCGTCAC | 131 | 0     |
| ABCA13 | TAAGCACCATCCTTACAGGC | 68  | 0     |
| ABCA13 | GTTCTGTGGGTTCTCGGAAA | 70  | 0     |
| ABCA13 | ATGCCCGAGAAAGTCCCTGA | 188 | 0     |
| ABCA13 | GTCGCACAGATCAGTTCTGT | 197 | 0     |
| ABCA13 | TAGCTGTTCAAGTGTTCAGG | 30  | 0     |
| ABCA13 | TGTGGGTTCTCGGAAAGGGA | 36  | 0     |
| ABCA13 | TCAGCAGATGCCGAACAAGA | 147 | 0     |
| ABCA13 | AGGATGGTGCTTATATCTGC | 0   | 0     |
| ABCA13 | CTGTGGGTTCTCGGAAAGGG | 0   | 0     |
| ABCA13 | CACTAGCTGTTCAGTGTTTC | 42  | 0     |
| ABCB1  | AACCCAAGGATAAGTTTGGG | 0   | 2042  |
| ABCB1  | CCTCCACCCAACTTATCCT  | 165 | 0     |
| ABCB1  | CTGGCTAAACTTCTCAACTC | 61  | 6559  |
| ABCB1  | CTAAGCCATGTAAGTCTTCG | 168 | 24726 |
| ABCB1  | GTAGCTCCTCCTCTGGTACT | 89  | 0     |
| ABCB1  | TGTAGCTCCTCCTCTGGTAC | 190 | 8777  |
| ABCB1  | GAGTTACATGGCTTAGGGAT | 7   | 51124 |
| ABCB1  | GTTACATGGCTTAGGGATTG | 115 | 34722 |
| ABCB1  | AGGAGGAGCTACATGAACTA | 154 | 64849 |
| ABCB1  | AGTGTTTATCCCAGTACCAG | 0   | 234   |
| ABCB4  | TCTCAGGAGGTCAAAAACAG | 9   | 0     |
| ABCB4  | TGAAACAAGAGTGGGAGATA | 29  | 0     |
| ABCB4  | GAAACAAGAGTGGGAGATAA | 123 | 0     |
| ABCB4  | AAACAAGAGTGGGAGATAAG | 194 | 0     |
| ABCB4  | GCAGAAATATGAAACAAGAG | 0   | 0     |
| ABCB4  | TCTCAATGGTATTCTACAAT | 75  | 0     |
| ABCB4  | ACTTCTTTAAAATAGGAGG  | 33  | 0     |
| ABCB4  | GATAAGGGGACTCAGCTCTC | 57  | 0     |
| ABCB4  | CTAGTGACTTTAATTCTCAA | 142 | 0     |
| ABCB4  | CAGAAATATGAAACAAGAGT | 66  | 0     |
| ABCB5  | ACAGCCATGGATATACTGGA | 0   | 0     |

|       |                      |     |   |
|-------|----------------------|-----|---|
| ABCB5 | GTAGGTAGGTAAAGAGGACA | 137 | 0 |
| ABCB5 | GGATATACTGGAAGGACTTG | 34  | 0 |
| ABCB5 | AAGGCGGTAGGTAGGTAAAG | 41  | 0 |
| ABCB5 | AATGAAAGAGACAAAGCCAT | 179 | 0 |
| ABCB5 | AGAGGTATTTTAAAGGCGGT | 36  | 0 |
| ABCB5 | GTATTTTAAAGGCGGTAGGT | 0   | 0 |
| ABCB5 | GGCTGTAATGTCAAATAATC | 168 | 0 |
| ABCB5 | CATTACAGCCATGGATATAC | 118 | 0 |
| ABCB5 | GAGAAGTTATGAGACAGAAT | 41  | 0 |
| ABCB6 | TCTCGCGCGCTAGAATCCT  | 0   | 0 |
| ABCB6 | GTCGTCAGATTTCCCGCCT  | 156 | 0 |
| ABCB6 | CCTCGGAGACATTTGGCCAA | 125 | 0 |
| ABCB6 | ACCTCCACGGAAGTGTGGGT | 331 | 0 |
| ABCB6 | ATTGGCCAAATGTCTCCGAG | 328 | 0 |
| ABCB6 | CCATTGGCCAAATGTCTCCG | 144 | 0 |
| ABCB6 | ATTTGGCCAATGGGAGCCGT | 71  | 0 |
| ABCB6 | GCGCGAGACAACAAGAAGTC | 51  | 0 |
| ABCB6 | TTCCGTGGAGGTTTCCAGCT | 29  | 0 |
| ABCB6 | AATGGGATGGGGACTCTGCC | 112 | 0 |
| ABCB7 | GGACACTGGCGGACTGAATT | 111 | 0 |
| ABCB7 | ACAATCAAAGCTCGGCCCTA | 64  | 0 |
| ABCB7 | CCAATATTTCCGGTTGTGTA | 120 | 0 |
| ABCB7 | AGGGGAGCGTGACATTGAGT | 42  | 0 |
| ABCB7 | CTCCTTCTTGTTTTCCA    | 226 | 0 |
| ABCB7 | CCTTACACAACCGGAATAT  | 31  | 0 |
| ABCB7 | AGAGGATTATGGGACTGG   | 61  | 0 |
| ABCB7 | CAGAATCCATTTCCGGTCTG | 32  | 0 |
| ABCB7 | GGAGCGTGACATTGAGTTGG | 69  | 0 |
| ABCB7 | GCGTGACATTGAGTTGGAGG | 22  | 0 |
| ABCB8 | GCTTTTGCCAGGTGCTCCTG | 58  | 0 |
| ABCB8 | CTACACGCCCTTGAGACGAC | 156 | 0 |
| ABCB8 | TAGAACGCGGTTTTGGGGG  | 22  | 0 |
| ABCB8 | TGGATACTCCATAGCTTGGA | 130 | 0 |
| ABCB8 | CTAGATGTCCCCTCGTCTCA | 287 | 0 |
| ABCB8 | GGCGTGTAGAACGCGGTTTT | 0   | 0 |
| ABCB8 | GACGGGACATCTAGAGATCC | 22  | 0 |

|        |                      |     |   |
|--------|----------------------|-----|---|
| ABCB8  | GCGTGTAGAACGCGGGTTTT | 122 | 0 |
| ABCB8  | TCTACACGCCCTTGAGACGA | 0   | 0 |
| ABCB8  | CTCAAGGGCGTGTAGAACGC | 43  | 0 |
| ABCB9  | ATGTGGGAGGAGTTTGCCAC | 24  | 0 |
| ABCB9  | GAAACCATTTCCGTCCCCTC | 111 | 0 |
| ABCB9  | TTGAGACAGGCTGATGGACG | 26  | 0 |
| ABCB9  | TAAGTGGCCTTTTTCCCTGG | 105 | 0 |
| ABCB9  | CCATTTCCGTCCCCTCAGGA | 109 | 0 |
| ABCB9  | TGGCAAACCTCTCCCACATC | 135 | 0 |
| ABCB9  | AAGGAGGCCAGCTTTTTAAC | 142 | 0 |
| ABCB9  | ACGGAAATGGTTTCACCTGA | 47  | 0 |
| ABCB9  | AACTGGCCTTTTTCCCTGGA | 53  | 0 |
| ABCB9  | GGAGTTTGCCACAGGTGAGC | 37  | 0 |
| ABCB10 | CTTATCGTGCCTGCACCCTC | 69  | 0 |
| ABCB10 | GTCCCCTCTGGTCTGAACTT | 40  | 0 |
| ABCB10 | AGGGTGCAGGCACGATAAGG | 36  | 0 |
| ABCB10 | ATAAGGCGGGTGACAGCCAG | 0   | 0 |
| ABCB10 | CCTTATCGTGCCTGCACCCT | 105 | 0 |
| ABCB10 | TTCCCAAGTTCAGACCAGAG | 72  | 0 |
| ABCB10 | CGTTCCCAAGTTCAGACCAG | 211 | 0 |
| ABCB10 | CGTCCCCTCTGGTCTGAACT | 77  | 0 |
| ABCB10 | CAAGTTCAGACCAGAGGGGA | 84  | 0 |
| ABCB10 | GTTCCCAAGTTCAGACCAGA | 0   | 0 |
| ABCC2  | CTACTGATGCTGCCCTTTGT | 86  | 0 |
| ABCC2  | ACAAGAGGCCTCTGTAGGAG | 0   | 0 |
| ABCC2  | AAAGTACAAGAGGCCTCTGT | 0   | 0 |
| ABCC2  | CTGAAAGATGTCAACAGAGC | 49  | 0 |
| ABCC2  | GGTGAGTCTCCCTGTCCCTA | 73  | 0 |
| ABCC2  | ACCAGTTCCCAAAGTACAAG | 96  | 0 |
| ABCC2  | ATGTATGGCCACTCCTACAG | 91  | 0 |
| ABCC2  | GACTAAAAAGCCCTAGGGAC | 71  | 0 |
| ABCC2  | TCTACTGATGCTGCCCTTTG | 383 | 0 |
| ABCC2  | GCCTCTTGACTTTGGGAAC  | 184 | 0 |
| ABCC3  | AAGGGCTTCTGTGCTCAATC | 79  | 0 |
| ABCC3  | GGGCCGATGAGTCATTGAGT | 109 | 0 |
| ABCC3  | TCCCCTACTCAATGACTCAT | 58  | 0 |

|       |                      |     |   |
|-------|----------------------|-----|---|
| ABCC3 | GAGTAGGGGACGTAGGGAGA | 88  | 0 |
| ABCC3 | AGTCGAGTCTATTTCCAAGG | 17  | 0 |
| ABCC3 | TCAATGACTCATCGGCCCA  | 219 | 0 |
| ABCC3 | AGGTTCCAGAGACCACTGGC | 44  | 0 |
| ABCC3 | AAGGTCACGTTCTCTCCGG  | 266 | 0 |
| ABCC3 | GAGTCGAGTCTATTTCCAAG | 143 | 0 |
| ABCC3 | ATCGGCCCCACGGACTTGTT | 307 | 0 |
| ABCC4 | AGTCTAGGCGCCGACACAGA | 74  | 0 |
| ABCC4 | TCTGTGTCGGCGCCTAGACT | 152 | 0 |
| ABCC4 | TCACTCGGGTTCGTGCACGT | 36  | 0 |
| ABCC4 | CCGACACAGAAGGTGGAGCA | 41  | 0 |
| ABCC4 | TTCACTCGGGTTCGTGCACG | 119 | 0 |
| ABCC4 | CTGCTACCCTCTCCATCCAG | 0   | 0 |
| ABCC4 | CCCTGCTCCACCTTCTGTGT | 231 | 0 |
| ABCC4 | ACACAGAAGGTGGAGCAGGG | 54  | 0 |
| ABCC4 | GAATTTCGGAAAGTTTCACT | 90  | 0 |
| ABCC4 | TCTCCATCCAGCGGCGCAGG | 94  | 0 |
| ABCC5 | AGACTGTCTGGAATCTTCTC | 41  | 0 |
| ABCC5 | ACTACATTTCCAGAAGCGC  | 62  | 0 |
| ABCC5 | TGTGTGCGAACACAGGGCCA | 0   | 0 |
| ABCC5 | CAGATACGATTGCTTGCTCA | 179 | 0 |
| ABCC5 | TCGCACACAGTGCTGTTCGT | 135 | 0 |
| ABCC5 | AGACAGTCTCGCAGAGGCAC | 27  | 0 |
| ABCC5 | CGGTATCTGCGCAGACTGCA | 65  | 0 |
| ABCC5 | ATGGAACAGAGCCGGGAGCT | 0   | 0 |
| ABCC5 | GCCACAACAGATAAGAACTG | 149 | 0 |
| ABCC5 | GATTCCAGACAGTCTCGCAG | 392 | 0 |
| CFTR  | CATTGTCCAACACCTGTGGT | 128 | 0 |
| CFTR  | TCACTCTTTCTGCCAACCAC | 35  | 0 |
| CFTR  | TTTCTGCCAACCACAGGTGT | 86  | 0 |
| CFTR  | GTGGTTGGCAGAAAGAGTGA | 132 | 0 |
| CFTR  | TATAAATCAAGCCACGTAGT | 37  | 0 |
| CFTR  | TTGGAGACTTTGACATGGTT | 38  | 0 |
| CFTR  | AGGATAAATTATGGATGTGG | 1   | 0 |
| CFTR  | AGGTGTTGGACAATGATTTG | 60  | 0 |
| CFTR  | AAATCATTGTCCAACACCTG | 0   | 0 |

|        |                        |     |   |
|--------|------------------------|-----|---|
| CFTR   | CCTACTCAACTGAAAAGTAC   | 162 | 0 |
| ABCC8  | TCTTTCAGATCGGGATCTG    | 41  | 0 |
| ABCC8  | CTCTCCTTCAGCCAAGTACC   | 263 | 0 |
| ABCC8  | TCTTTGGACACCACAGGTTT   | 75  | 0 |
| ABCC8  | TTGGCTGAAGGAGAGCTGGG   | 0   | 0 |
| ABCC8  | AATAGCCTCTATGCTAGCTC   | 0   | 0 |
| ABCC8  | GTCCCTGTGTAAGCCCTCTC   | 31  | 0 |
| ABCC8  | CTCTTTGGACACCACAGGTT   | 69  | 0 |
| ABCC8  | AGGAAACAAGCCCAAACCTG   | 36  | 0 |
| ABCC8  | GGGCAGTGGTGTGTCTCTAT   | 29  | 0 |
| ABCC8  | GTACTIONGGCTGAAGGAGAGC | 35  | 0 |
| ABCC9  | CTCATTGAGGTACTACTAT    | 97  | 0 |
| ABCC9  | AAGAAAGCTTCAAGTTGCTT   | 30  | 0 |
| ABCC9  | CCTCAGCTATCAAAGTAAAA   | 26  | 0 |
| ABCC9  | TTCTCTGGAAGTAAAAGCTA   | 162 | 0 |
| ABCC9  | ATGATATAGCCCTCTATTCA   | 58  | 0 |
| ABCC9  | TTTAGTCAGACACTCATTTG   | 85  | 0 |
| ABCC9  | TCCTCAGCTATCAAAGTAAA   | 110 | 0 |
| ABCC9  | CACATGAAAGCATTTTTCTC   | 125 | 0 |
| ABCC9  | CAGAGAAAAATGCTTTCATG   | 64  | 0 |
| ABCC9  | CCCTTTTACTTTGATAGCTG   | 0   | 0 |
| ABCC10 | GCATTATTTGTCCGTGGGGC   | 0   | 0 |
| ABCC10 | ATTCTAGGGCTGCATGACCT   | 116 | 0 |
| ABCC10 | TTCTTGAAGAGGTGGGGAGC   | 46  | 0 |
| ABCC10 | ATTCAAACATACCTGCCCA    | 248 | 0 |
| ABCC10 | GCCATCCTCCTGGGATCTAC   | 114 | 0 |
| ABCC10 | CTCCCCACCTCTTCAAGAAA   | 57  | 0 |
| ABCC10 | CCCAGTCTCAGATAGATAGA   | 21  | 0 |
| ABCC10 | GCCTCAACTTTTTTTTGGGG   | 0   | 0 |
| ABCC10 | CCTCAACTTTTTTTTGGGGG   | 35  | 0 |
| ABCC10 | CCCCCCCCAAAAAAAGTTG    | 0   | 0 |
| ABCC11 | AAGGTCCTCGTTAGCGAAAT   | 102 | 0 |
| ABCC11 | TAAAGAGCCACGGATCCCAG   | 124 | 0 |
| ABCC11 | CGAGGTCAGACAGCAGTAGG   | 202 | 0 |
| ABCC11 | CTAAAGAGCCACGGATCCCA   | 113 | 0 |
| ABCC11 | TCTAAAGAGCCACGGATCCC   | 22  | 0 |



|        |                       |     |   |
|--------|-----------------------|-----|---|
| ABCC11 | TCCGTGGCTCTTTAGAGTCA  | 50  | 0 |
| ABCC11 | CCCTTGACTCTAAAGAGCCA  | 68  | 0 |
| ABCC11 | CAAAGAACTCATGGGGCAG   | 186 | 0 |
| ABCC11 | TGCGTTGATTTTGTCCCTGC  | 148 | 0 |
| ABCC11 | CCGTGGCTCTTTAGAGTCAA  | 136 | 0 |
| ABCC12 | CTGACCAGTGGGTATCAGGA  | 33  | 0 |
| ABCC12 | GGCAGCAGTCACAGAAGTGT  | 123 | 0 |
| ABCC12 | CCAGTGGGTATCAGGATGGA  | 29  | 0 |
| ABCC12 | TTTTCTTGGGGCTCTTCCC   | 209 | 0 |
| ABCC12 | ACCAGTGGGTATCAGGATGG  | 214 | 0 |
| ABCC12 | GGAAAGAGCCCCAAGAAAAT  | 0   | 0 |
| ABCC12 | CTTCAACAACACCACCCTC   | 70  | 0 |
| ABCC12 | GTTGAAGTTCTCTGACCAGT  | 159 | 0 |
| ABCC12 | TGTTGAAGTTCTCTGACCAG  | 106 | 0 |
| ABCC12 | TCAGATTCTCTCAGATCCCC  | 41  | 0 |
| ABCD1  | AGCGACAGTGACTCCTCCAC  | 211 | 0 |
| ABCD1  | GAAGAGTGGGTGGGGATTCT  | 17  | 0 |
| ABCD1  | GGAAGAGTGGGTGGGGATTC  | 32  | 0 |
| ABCD1  | CGAGGGGCGAGAACAGGGTG  | 92  | 0 |
| ABCD1  | CACCTCCCGTTCTCGCCCCT  | 234 | 0 |
| ABCD1  | GGCCGCGCGGACTAGAGAAG  | 48  | 0 |
| ABCD1  | GAGAACGGGAGGTGGGGGTG  | 53  | 0 |
| ABCD1  | CCTCCCGCACCACAGAGACG  | 136 | 0 |
| ABCD1  | CACGTCTCTGTGGTGCGGGA  | 68  | 0 |
| ABCD1  | GCGCCTCTTCTCTCCCGCT   | 367 | 0 |
| ABCD2  | GGTCGAATCAGGCCATCTGC  | 39  | 0 |
| ABCD2  | TCAGACTCCGCTGCATCTAC  | 112 | 0 |
| ABCD2  | TCATTGGCTGTGAGGGCGGT  | 59  | 0 |
| ABCD2  | ATCATTCCCGGTAGATGCAG  | 123 | 0 |
| ABCD2  | CGGTTTTGTTCCGCCAGCAGA | 59  | 0 |
| ABCD2  | ACCGCCCTCACAGCCAATGA  | 188 | 0 |
| ABCD2  | CAGACTCCGCTGCATCTACC  | 187 | 0 |
| ABCD2  | GCTTCTGAGAGAATCATTCC  | 156 | 0 |
| ABCD2  | TCACAGCCAATGAGGGGCCT  | 0   | 0 |
| ABCD2  | GGGAAGCTGCGAGGATTCCA  | 183 | 0 |
| ABCD3  | ACCCCGGCTTTCACAATAAC  | 41  | 0 |

|       |                      |     |   |
|-------|----------------------|-----|---|
| ABCD3 | CTGGAGCCCACTTTGTA    | 0   | 0 |
| ABCD3 | AATAACTGGATGAGCGGGCC | 23  | 0 |
| ABCD3 | CTACCTTACTGCACGCAGCG | 122 | 0 |
| ABCD3 | ACAAAGTGGGCTCCAGAGCG | 149 | 0 |
| ABCD3 | TCCAGTTATTGTGAAAGCCG | 0   | 0 |
| ABCD3 | CGCCGGGCCAAAGTACAAAG | 0   | 0 |
| ABCD3 | TACCTTACTGCACGCAGCGC | 34  | 0 |
| ABCD3 | CTTCAGGGTCTCCGAAACG  | 7   | 0 |
| ABCD3 | GCCGGGCCAAAGTACAAAGT | 95  | 0 |
| ABCD4 | ACAGCGCCCCATATTTTCT  | 138 | 0 |
| ABCD4 | TACAGCGCCCCATATTTTC  | 92  | 0 |
| ABCD4 | AAAGTACCAGAGAGTGGACT | 77  | 0 |
| ABCD4 | AAAGATCATGCTGGCTTCTC | 270 | 0 |
| ABCD4 | GGGAAGTCTCCAGAAAATA  | 106 | 0 |
| ABCD4 | AAGATCATGCTGGCTTCTCT | 211 | 0 |
| ABCD4 | ACAAAAGCATTAGCCGGGGA | 65  | 0 |
| ABCD4 | GATTACAGGAGTAACCCACC | 15  | 0 |
| ABCD4 | TATAAATTAGGCTTCCAGCC | 37  | 0 |
| ABCD4 | CCGAGCTACTCTGGAGGCTG | 0   | 0 |
| ABCE1 | TCAACTGTGTGGTCAGTTCA | 382 | 0 |
| ABCE1 | TCAACTGCCGGACTTGGGAC | 106 | 0 |
| ABCE1 | AGAATTCAACTGCCGGACTT | 41  | 0 |
| ABCE1 | TTAGGGCAGAATTCAACTGC | 66  | 0 |
| ABCE1 | TTGTCACTTGCCTGCAAGTT | 91  | 0 |
| ABCE1 | CTCGGAAAAGATTGGATTCC | 25  | 0 |
| ABCE1 | CTCAACTGTGTGGTCAGTTC | 83  | 0 |
| ABCE1 | CTAGATCTCACCTAACTTGC | 185 | 0 |
| ABCE1 | ACGGACTGTAACTTTGGCA  | 1   | 0 |
| ABCE1 | GAACTGACCACACAGTTGAG | 89  | 0 |
| ABCF2 | TCCTTAGGATCCTCCGCGTG | 128 | 0 |
| ABCF2 | GGGATACATAGTAGTCCTCA | 35  | 0 |
| ABCF2 | GTAAAGCCTGAAGGCTCAGC | 0   | 0 |
| ABCF2 | GATAAACCGGCTGAGCCTTC | 52  | 0 |
| ABCF2 | CTCTTGGCCGCTGCAACTTG | 0   | 0 |
| ABCF2 | GAGCAGCTCTGTTGCGACAT | 79  | 0 |
| ABCF2 | GCAAATCCCAGATTGCTCGT | 118 | 0 |

|       |                      |     |   |
|-------|----------------------|-----|---|
| ABCF2 | CTCAAGGCGGGTCTCACTCT | 37  | 0 |
| ABCF2 | CAAGAGTGAGACCCGCCTTG | 68  | 0 |
| ABCF2 | TGTATCCCACAGACCTCGCG | 45  | 0 |
| ABCF3 | GGCTCCAAAATGGGCCTGAC | 44  | 0 |
| ABCF3 | CTTCTGAGAGTCAGGGACCG | 33  | 0 |
| ABCF3 | CTGAGAAGCCCGTAGGGTCT | 0   | 0 |
| ABCF3 | GGGTGAGTCAGCAAAGCTCT | 20  | 0 |
| ABCF3 | TTTATCAGCCGCCTGCCTCT | 65  | 0 |
| ABCF3 | TTATCAGCCGCCTGCCTCTT | 159 | 0 |
| ABCF3 | TGGGAGCTCAAGGTTTATCG | 49  | 0 |
| ABCF3 | TGCGGTTCTCGCTGCCTTCT | 239 | 0 |
| ABCF3 | TCGAGGGAGCGCATAAAACC | 0   | 0 |
| ABCF3 | GCGAAAGCAAAGCACTGAGC | 161 | 0 |
| ABCG1 | TCCTTCTGTGGACAGGTACT | 23  | 0 |
| ABCG1 | ACTTGGGTCCTTCTGTGGAC | 232 | 0 |
| ABCG1 | CTATTACACTGTAGACCTGG | 66  | 0 |
| ABCG1 | TTACGCCCAGTGACTTGTGA | 1   | 0 |
| ABCG1 | ACCTAGTACCTGTCCACAGA | 111 | 0 |
| ABCG1 | GAAGTGAGCAGGGTTACTAA | 0   | 0 |
| ABCG1 | TTTACGCCCAGTGACTTGTG | 112 | 0 |
| ABCG1 | CTGTTCCCTCACAAGTCACT | 63  | 0 |
| ABCG1 | TCTGTTCCCTCACAAGTCAC | 163 | 0 |
| ABCG1 | GCAGAAAACAGGAAGTGAGC | 0   | 0 |
| ABCG2 | GTATCTTTCTCTTTGTGCCG | 41  | 0 |
| ABCG2 | GTCAGCGTGGGATCCTCTTC | 0   | 0 |
| ABCG2 | ATGCTGTCATCAGAATTCCG | 0   | 0 |
| ABCG2 | CTAATGGTTCCAGTCAGCGT | 41  | 0 |
| ABCG2 | TCTTCTGGCATTCTAGCAA  | 64  | 0 |
| ABCG2 | TAGCAAGGGGCTAGAAGAAG | 0   | 0 |
| ABCG2 | CTAGCAAGGGGCTAGAAGAA | 133 | 0 |
| ABCG2 | GAAGAGGATCCCACGCTGAC | 91  | 0 |
| ABCG2 | CCACGCTGACTGGAACCATT | 74  | 0 |
| ABCG2 | CCTAATGGTTCCAGTCAGCG | 38  | 0 |
| ABCG4 | CCTCGTTTGGGGATTCTGG  | 0   | 0 |
| ABCG4 | CTTCCAGGGACTTGTCCCCA | 0   | 0 |
| ABCG4 | TTCAAAAACGCAGGAGCCTT | 38  | 0 |

|        |                       |     |   |
|--------|-----------------------|-----|---|
| ABCG4  | CTGGAAGCTGAGGGAAATTGT | 76  | 0 |
| ABCG4  | GAAAGCCTTTGCACCTCGTT  | 85  | 0 |
| ABCG4  | CCTCCAGGAATCCCCAAACG  | 60  | 0 |
| ABCG4  | AAGCCTTTGCACCTCGTTTG  | 133 | 0 |
| ABCG4  | AAGTCCCTGGAAGACAGATT  | 42  | 0 |
| ABCG4  | GGAGGCCTGCGCTCATTAT   | 171 | 0 |
| ABCG4  | AATCCCCAAACGAGGTGCAA  | 97  | 0 |
| ABCG5  | TCTAAGAGAGCTGCAGCCCA  | 271 | 0 |
| ABCG5  | GTGAGTGAGCAATGGGAAGT  | 132 | 0 |
| ABCG5  | AGAACACACACGTTTGTAGG  | 21  | 0 |
| ABCG5  | CGCGTCCTTATCTTGACAGT  | 564 | 0 |
| ABCG5  | TGTAGGTGGCTTGCCAGCA   | 234 | 0 |
| ABCG5  | GATAAGGACGCGCTGGCTAA  | 375 | 0 |
| ABCG5  | TACCTCGGTGAGTGAGCAAT  | 136 | 0 |
| ABCG5  | CTCACTACCGAGGTATCCT   | 147 | 0 |
| ABCG5  | GCGCGTCCTTATCTTGACAG  | 33  | 0 |
| ABCG5  | CTGTCAAGATAAGGACGCGC  | 74  | 0 |
| ABCG8  | CGCGTCCTTATCTTGACAGT  | 564 | 0 |
| ABCG8  | AGAACACACACGTTTGTAGG  | 21  | 0 |
| ABCG8  | TCTCATCTTTGACCCCGGA   | 29  | 0 |
| ABCG8  | TGGGCAAATTTTCTGGTGGC  | 30  | 0 |
| ABCG8  | GATAAGGACGCGCTGGCTAA  | 375 | 0 |
| ABCG8  | GACCTCTCATCTTTGACCCC  | 109 | 0 |
| ABCG8  | CTCTCATCTTTGACCCCGG   | 86  | 0 |
| ABCG8  | TTCTGCCCACTGTCAAGATA  | 318 | 0 |
| ABCG8  | CAACTGAAGCCACTCTGGGG  | 0   | 0 |
| ABCG8  | TCCCCAACTGAAGCCACTCT  | 199 | 0 |
| ATP1A1 | CAGATCGATTCCAGCTATGA  | 35  | 0 |
| ATP1A1 | AGGAGGGCGCTTGAACTTC   | 0   | 0 |
| ATP1A1 | TCAGAGTGCCTCCTGTGACT  | 27  | 0 |
| ATP1A1 | GGAGCGGGAAGTGGATAAAG  | 291 | 0 |
| ATP1A1 | TAGCTGGAATCGATCTGAAC  | 204 | 0 |
| ATP1A1 | TCTCGAAGAAAGAGAGGTGG  | 0   | 0 |
| ATP1A1 | AGCTATGACGGAGCGGGAAG  | 52  | 0 |
| ATP1A1 | CGATTCCAGCTATGACGGAG  | 1   | 0 |
| ATP1A1 | AATCCCCAACTGGACAAGC   | 102 | 0 |

|        |                       |     |   |
|--------|-----------------------|-----|---|
| ATP1A1 | GAATCTCGAAGAAAGAGAGG  | 0   | 0 |
| ATP1A2 | GTGGCACTCACAACCTGAGAG | 0   | 0 |
| ATP1A2 | TAGACAGCCCGTTTGTCCCA  | 82  | 0 |
| ATP1A2 | CCCCTTCAGCCAGATCCAAG  | 74  | 0 |
| ATP1A2 | TCCCCTTCAGCCAGATCCAA  | 124 | 0 |
| ATP1A2 | GGGATATGCCCCCTTGGATC  | 36  | 0 |
| ATP1A2 | ACAAACGTTTCTTTCGGAGG  | 32  | 0 |
| ATP1A2 | AAACGTTTCTTTCGGAGGAG  | 93  | 0 |
| ATP1A2 | GTGGGACAAACGGGCTGTCT  | 21  | 0 |
| ATP1A2 | CCCCTTGGATCTGGCTGAAG  | 34  | 0 |
| ATP1A2 | CCCCTTGGATCTGGCTGAA   | 64  | 0 |
| ATP1A3 | TTCCCAGAGACCTCCGCAAT  | 177 | 0 |
| ATP1A3 | CCCAGAGACCTCCGCAATAG  | 73  | 0 |
| ATP1A3 | ATCACCGAGAAGGGTACGCT  | 85  | 0 |
| ATP1A3 | TCCCAGAGACCTCCGCAATA  | 106 | 0 |
| ATP1A3 | TACTGCAGCTGTCCTCCCCT  | 366 | 0 |
| ATP1A3 | TGGAGTAGGGCCTCCAAGAA  | 166 | 0 |
| ATP1A3 | TCCCCTATTGCGGAGGTCTC  | 27  | 0 |
| ATP1A3 | GGAGGACAGCTGCAGTACCA  | 159 | 0 |
| ATP1A3 | GGCCCTACTCCATATTGAGG  | 142 | 0 |
| ATP1A3 | TCACCGAGAAGGGTACGCTG  | 0   | 0 |
| ATP1A4 | CATCGCCAAGGCAAGACTTC  | 227 | 0 |
| ATP1A4 | GGCCTTTGTGATGCCAGACC  | 38  | 0 |
| ATP1A4 | GTCCAGGTCTGCTGTCGCAA  | 83  | 0 |
| ATP1A4 | TGCAGACTTTGGAGGCTTAG  | 45  | 0 |
| ATP1A4 | CTGTCGCAAAGGCCTCATGA  | 40  | 0 |
| ATP1A4 | AGTCTCAGTCTTTGGGTTTG  | 160 | 0 |
| ATP1A4 | AAATAAAGCGGGTATTCGGC  | 26  | 0 |
| ATP1A4 | AATAAAGCGGGTATTCGGCC  | 36  | 0 |
| ATP1A4 | GACTGAGACTTCTAGGTTCT  | 51  | 0 |
| ATP1A4 | AGAATCCAGAAGTCTTGCCT  | 103 | 0 |
| ATP1B1 | GAAAACAACCAGACTTTGCC  | 76  | 0 |
| ATP1B1 | TTGTGGATCAGTCAGTAGGT  | 0   | 0 |
| ATP1B1 | TGTGGATCAGTCAGTAGGTT  | 57  | 0 |
| ATP1B1 | ATTTTGTGCAGCCTGTTGCT  | 62  | 0 |
| ATP1B1 | TGTGCAGCCTGTTGCTTGGT  | 69  | 0 |

|        |                      |     |   |
|--------|----------------------|-----|---|
| ATP1B1 | ACAGTTGTGGATCAGTCAGT | 29  | 0 |
| ATP1B1 | GCCCGAAACCTGGCAAAGTC | 63  | 0 |
| ATP1B1 | CTATGAGTCGTGACTGCGTG | 32  | 0 |
| ATP1B1 | GTGACTGCGTGAGGGAAGGA | 40  | 0 |
| ATP1B1 | TATGAGTCGTGACTGCGTGA | 99  | 0 |
| ATP1B2 | TGGACGGCAGTTTGGATGTG | 150 | 0 |
| ATP1B2 | GATGTGAGGTGTTGAGAAAC | 35  | 0 |
| ATP1B2 | AGTAACATCCAGTGGAGCAC | 18  | 0 |
| ATP1B2 | TGAGGATGTGGACGGCAGTT | 51  | 0 |
| ATP1B2 | GGTGTTGAGAACTGGGCTA  | 0   | 0 |
| ATP1B2 | GGCCCATGCTCATAGTTGTT | 68  | 0 |
| ATP1B2 | AACCCACTCCCTCCAGTCCA | 162 | 0 |
| ATP1B2 | CAGCTCCATGAATGTTTGGG | 25  | 0 |
| ATP1B2 | CAAATCTTGCCGTTTTTCCT | 74  | 0 |
| ATP1B2 | TCAGCTCCATGAATGTTTGG | 72  | 0 |
| ATP1B3 | CCTCGCTTGGCTCCCTTGAA | 113 | 0 |
| ATP1B3 | CACAGGAAAGGAACACTCGT | 72  | 0 |
| ATP1B3 | GGGTTAAGAGTAGGAGCGTC | 1   | 0 |
| ATP1B3 | AACGAGTGTTCTTTCTGT   | 97  | 0 |
| ATP1B3 | GCAGTGCACCGGTACATTG  | 68  | 0 |
| ATP1B3 | GGAGCGTCTGGGCAAAGCT  | 0   | 0 |
| ATP1B3 | ACGTGCTTTCCCAAGGGTCC | 70  | 0 |
| ATP1B3 | AAAAGCCGGCGACACTACAC | 72  | 0 |
| ATP1B3 | AGGAAAGGAACACTCGTTGG | 175 | 0 |
| ATP1B3 | CGGGGCTCCCACAATGTACA | 165 | 0 |
| FXD2   | GGTTGGTTAATTCCAGGGCC | 52  | 0 |
| FXD2   | AGGGGGGTACATATGGAAAA | 68  | 0 |
| FXD2   | ATATGTACCCCCCTGGGCCA | 100 | 0 |
| FXD2   | CCCCTCTGGTACTAAGCTC  | 38  | 0 |
| FXD2   | GCCCCAAGAGTGGAAGAGG  | 0   | 0 |
| FXD2   | GCACATTAGGAGTCCGCACT | 74  | 0 |
| FXD2   | TACCAAGATGGCCTCTGTG  | 66  | 0 |
| FXD2   | AGGCCCCAGGCTACCAAGAT | 192 | 0 |
| FXD2   | CCCAGCTTAGTACCAGGAG  | 0   | 0 |
| FXD2   | CACTCTGGGGCCACCTATT  | 275 | 0 |
| ATP1B4 | AGTTGGATATCAGTGCATGC | 294 | 0 |

|        |                       |     |   |
|--------|-----------------------|-----|---|
| ATP1B4 | TTGGATATCAGTGCATGCAG  | 130 | 0 |
| ATP1B4 | TTGGCTCCTCCCTGAATCA   | 84  | 0 |
| ATP1B4 | CTCCAGCGCTTGAGATATGA  | 35  | 0 |
| ATP1B4 | GAATCAAGGGAAAGCCCTTA  | 20  | 0 |
| ATP1B4 | AGCTCATCATTACAAGGAGG  | 44  | 0 |
| ATP1B4 | ACAGGAGACACTGGTTGCTG  | 102 | 0 |
| ATP1B4 | ACAAGGAGGGGGAGATATTC  | 37  | 0 |
| ATP1B4 | AGACATATAAAGGGGGCGGG  | 0   | 0 |
| ATP1B4 | GCAAGCTCATCATTACAAGG  | 52  | 0 |
| ATP2A1 | AGAGGGCTCCGGAAGAAGCT  | 0   | 0 |
| ATP2A1 | TGGGAAATTCATGCAGCTG   | 125 | 0 |
| ATP2A1 | GATATTTCTGCTGACAGAGG  | 0   | 0 |
| ATP2A1 | CAGAGATACCCCAAGCCTTT  | 35  | 0 |
| ATP2A1 | ATCAGTCCCCCAAAGGCTTG  | 155 | 0 |
| ATP2A1 | CTTCAGCAAATGGGGTGAGG  | 0   | 0 |
| ATP2A1 | CACCCCATTTGCTGAAGCAG  | 200 | 0 |
| ATP2A1 | GAGACTGCGGCAATGGAAAC  | 204 | 0 |
| ATP2A1 | GTCACTCATGAGGGACGCAA  | 70  | 0 |
| ATP2A1 | TGCTGACAGAGGGGGAACAG  | 53  | 0 |
| ATP2A2 | TAGCTGACGCAGCGCTTGAT  | 79  | 0 |
| ATP2A2 | GTTCCCGAGGCGACAGATGA  | 31  | 0 |
| ATP2A2 | GCCACACAGCAGCTAGACTT  | 125 | 0 |
| ATP2A2 | GCAGCTAGACTTGGGCTAGG  | 310 | 0 |
| ATP2A2 | GCCCAAGTCTAGCTGCTGTG  | 132 | 0 |
| ATP2A2 | TTCCCTCGACAGGAGAAAAG  | 36  | 0 |
| ATP2A2 | GAGGCGACAGATGAAGGATT  | 0   | 0 |
| ATP2A2 | TCGCTGTGGCTTTCAGATGA  | 212 | 0 |
| ATP2A2 | GCGCTTGATAGGTGTCTGCA  | 113 | 0 |
| ATP2A2 | GTCCCCTTTTCTCCTGTGCA  | 150 | 0 |
| ATP2A3 | CACTTCGCAGAATTCGAGCT  | 125 | 0 |
| ATP2A3 | TCACTTCGCAGAATTCGAGC  | 0   | 0 |
| ATP2A3 | ATTCTGCGAAGTGAAGTCCAG | 45  | 0 |
| ATP2A3 | TTCTGCGAAGTGAAGTCCAGA | 117 | 0 |
| ATP2A3 | CAGAATTCGAGCTGGGAAGC  | 56  | 0 |
| ATP2A3 | TTCCCCTCTGCAGAATGGGC  | 141 | 0 |
| ATP2A3 | TTCCCCTCTGCAGAATGGG   | 46  | 0 |

|        |                        |     |   |
|--------|------------------------|-----|---|
| ATP2A3 | CAGTTTCCCCTCTGCAGAAT   | 211 | 0 |
| ATP2A3 | TCAGTTTCCCCTCTGCAGAA   | 36  | 0 |
| ATP2A3 | TCCGCGGAGCTGCTAGGGGT   | 131 | 0 |
| ATP2B1 | GAAGAAGGAGTAACACCTCA   | 117 | 0 |
| ATP2B1 | AAGAAGGAGTAACACCTCAT   | 107 | 0 |
| ATP2B1 | CTCTTACTACTAGAAGAAGA   | 25  | 0 |
| ATP2B1 | GCACTTTAAAAGCACAAGAC   | 37  | 0 |
| ATP2B1 | AAAACAACACTAGCATAGTGCT | 0   | 0 |
| ATP2B1 | CATTACAATTTAATCCCATG   | 47  | 0 |
| ATP2B1 | CATATTTTCTAAATGTCACC   | 0   | 0 |
| ATP2B1 | AATTATCTACTTTAGCTACC   | 0   | 0 |
| ATP2B1 | ACAATAACAGTAATACTGAG   | 40  | 0 |
| ATP2B2 | TCCTGAGCACCTGTCCCATG   | 110 | 0 |
| ATP2B2 | AAGCACAGAGTGAGTGACAA   | 40  | 0 |
| ATP2B2 | AGGTTGCTGTGCGTGTGCCT   | 32  | 0 |
| ATP2B2 | TAGGTTGCTGTGCGTGTGCC   | 0   | 0 |
| ATP2B2 | GTGCCACAGCTGACCAGTGA   | 134 | 0 |
| ATP2B2 | TGACCAGTGAGGGTGTGCTG   | 33  | 0 |
| ATP2B2 | CAGTGGTGGTGAGCTCCAAG   | 183 | 0 |
| ATP2B2 | CAAGAGGTGTCCTCCGGTGT   | 176 | 0 |
| ATP2B2 | GGCATCTACATGGTCAGGGG   | 0   | 0 |
| ATP2B2 | GAACTGGCATCTACATGGTC   | 107 | 0 |
| ATP2B3 | CAGCCTCAGTCGCAAGCTCA   | 252 | 0 |
| ATP2B3 | GCGTCTCCCCAACAGTAAAA   | 46  | 0 |
| ATP2B3 | GTTGGGGAGACGCACCTAGA   | 153 | 0 |
| ATP2B3 | TGTTGGGGAGACGCACCTAG   | 0   | 0 |
| ATP2B3 | TCTGTGCCCCATTTACTGT    | 79  | 0 |
| ATP2B3 | CTGTGCCCCATTTACTGTT    | 257 | 0 |
| ATP2B3 | GGATGGAAACTGGGGGACCA   | 45  | 0 |
| ATP2B3 | GTAAAATGGGGCACAGAGCC   | 83  | 0 |
| ATP2B3 | GTGGGTGGGGATGGAAACTG   | 17  | 0 |
| ATP2B3 | GGTGTCTCTCTGCACTCAC    | 156 | 0 |
| ATP2B4 | CCTGGATCTAAGTGAGTAAG   | 96  | 0 |
| ATP2B4 | GGCGGTATTCAACGGTTGCT   | 81  | 0 |
| ATP2B4 | TGTCTGAATAGGGGGTTCCT   | 34  | 0 |
| ATP2B4 | CTCCCCTACACCTTATATAC   | 122 | 0 |



|        |                      |     |   |
|--------|----------------------|-----|---|
| ATP2B4 | ATATAAGGTGTAGGGGAGGA | 0   | 0 |
| ATP2B4 | CCCCCTATTCAGACAGGAGC | 106 | 0 |
| ATP2B4 | GTCCTGGATCTAAGTGAGTA | 104 | 0 |
| ATP2B4 | ACTGTCAGTATACCTCTGGT | 87  | 0 |
| ATP2B4 | CCCCTTACTCACTTAGATCC | 69  | 0 |
| ATP2B4 | ATTCAACGGTTGCTGGGCGG | 100 | 0 |
| ATP2C1 | CATACCCACAGACTCTCGTG | 40  | 0 |
| ATP2C1 | TTAAGCCTCACGAGAGTCTG | 139 | 0 |
| ATP2C1 | TAAGCCTCACGAGAGTCTGT | 48  | 0 |
| ATP2C1 | CCTGAATTCCTATTGCCCTT | 75  | 0 |
| ATP2C1 | AGCTCAGTTGCGGTCTGAGC | 47  | 0 |
| ATP2C1 | CCAAAGGGCAATAGGAATTC | 43  | 0 |
| ATP2C1 | CTCACGAGAGTCTGTGGGTA | 39  | 0 |
| ATP2C1 | ACAGACACACAGCTCAGTTG | 34  | 0 |
| ATP2C1 | CTTAAACAGGGCATGAGATG | 36  | 0 |
| ATP2C1 | GGCAATAGGAATTCAGGGGC | 15  | 0 |
| ATP4A  | GGACCAGTCCTGATATACCC | 0   | 0 |
| ATP4A  | TCTCAGGGCAGGTTGACATG | 152 | 0 |
| ATP4A  | TTCTCCTATGGCTCCATCAC | 238 | 0 |
| ATP4A  | AGGTTGACATGGGGGGATCT | 72  | 0 |
| ATP4A  | TGTTGCTGCAGCGGTTCCCA | 176 | 0 |
| ATP4A  | ATCTCAGGGCAGGTTGACAT | 106 | 0 |
| ATP4A  | TTGTTGCTGCAGCGGTTCCC | 121 | 0 |
| ATP4A  | ATATACCCAGGGAGGGCGGT | 0   | 0 |
| ATP4A  | GGGGTTGAGTCATTCTCCTA | 151 | 0 |
| ATP4A  | TTGTCCCCTCAAAGGGTTAT | 91  | 0 |
| ATP4B  | GAGGAAACTATAAAGCCCAG | 82  | 0 |
| ATP4B  | ATTGCGGTGAGGGCACGTTT | 0   | 0 |
| ATP4B  | CAATCTCCCTCCTGAAGGAG | 71  | 0 |
| ATP4B  | AGCTTTGTCTGCTCTGATTG | 117 | 0 |
| ATP4B  | GAAACTATAAAGCCCAGAGG | 0   | 0 |
| ATP4B  | TGGGCATCTGGCCTCAGTCT | 0   | 0 |
| ATP4B  | GTCTGCTCTGATTGCGGTGA | 58  | 0 |
| ATP4B  | ACCCACTGTGTCCACGACCT | 202 | 0 |
| ATP4B  | GACCTCAATCTCCCTCCTGA | 23  | 0 |
| ATP4B  | CCAGAGGTCAAAGGCATCGC | 105 | 0 |

|        |                      |     |    |
|--------|----------------------|-----|----|
| ATP5A1 | CGCCGCCACTCTGCATTTTT | 132 | 0  |
| ATP5A1 | TTGCTACTCGTGCTAAACCA | 0   | 0  |
| ATP5A1 | ACCGACTATTAATCGCCC   | 343 | 0  |
| ATP5A1 | ACAGTGAACAGCTAAACCCC | 27  | 0  |
| ATP5A1 | CCTCATCCTCTAGCACCAGA | 81  | 0  |
| ATP5A1 | TCTAGCACCAGATGGGGCCT | 119 | 0  |
| ATP5A1 | CAAAAAATGCAGAGTGGCGG | 0   | 0  |
| ATP5A1 | TCATCCTCTAGCACCAGATG | 150 | 0  |
| ATP5A1 | AGTCGACCTTGTGGTTGCC  | 107 | 0  |
| ATP5A1 | GAACAGCTAAACCCCGGGAC | 0   | 46 |
| ATP5B  | AGTCCTTTGTGTGACGGAAA | 42  | 0  |
| ATP5B  | TGGGGTCTTGTGCATGCGGA | 0   | 0  |
| ATP5B  | GTTCAGTACCCCTATTCAAC | 112 | 0  |
| ATP5B  | CAGGCCTCTTCCGCTTGTA  | 179 | 0  |
| ATP5B  | TCAGGCCAGTTAAAGGTCAT | 74  | 0  |
| ATP5B  | AGGACTTAACACACAAGGAG | 25  | 0  |
| ATP5B  | GTTGACCTTCCGGTTGAATA | 59  | 0  |
| ATP5B  | CGTTCCGTACAAGCGGAAAG | 0   | 0  |
| ATP5B  | AGTACCCCTATTCAACCGGA | 126 | 0  |
| ATP5B  | GTACGGAACGCGTGTCCAAG | 35  | 0  |
| ATP5C1 | GTTTCTTCGCGCTACGGCGA | 81  | 0  |
| ATP5C1 | GGCACTGCTTCTGGCACATC | 199 | 0  |
| ATP5C1 | TTTCTTCGCGCTACGGCGAG | 34  | 0  |
| ATP5C1 | CCACGGCAGCGATCACTTTC | 257 | 0  |
| ATP5C1 | CCAGAAAGTGATCGCTGCCG | 37  | 0  |
| ATP5C1 | AGATGTGCCAGAAGCAGTGC | 121 | 0  |
| ATP5C1 | AGTACTCAGCCAGCCGGAAA | 40  | 0  |
| ATP5C1 | AATCCCAGCTGAGAGGCGGA | 64  | 0  |
| ATP5C1 | CGCCAACAGGATCAAGTCCA | 0   | 0  |
| ATP5C1 | TTCCGGCTGGCTGAGTACTG | 144 | 0  |
| ATP5D  | TGGGGCGCTCATTGGATGCA | 173 | 0  |
| ATP5D  | AGGGGGTGGTCAGATAAGGG | 0   | 0  |
| ATP5D  | GTTGCAGTTTTGTTCCGGCC | 115 | 0  |
| ATP5D  | CCCCAGAATACCTCACGAC  | 56  | 0  |
| ATP5D  | TGCCCCGTCGTGAGGTATTC | 209 | 0  |
| ATP5D  | CCCGTCGTGAGGTATTCTGG | 127 | 0  |

|        |                      |     |   |
|--------|----------------------|-----|---|
| ATP5D  | ACCCCCAGAATACCTCACGA | 147 | 0 |
| ATP5D  | GCCCCGTCGTGAGGTATTCT | 39  | 0 |
| ATP5D  | AAGGGCGGTGAAACCGTCCT | 26  | 0 |
| ATP5D  | TTGCAGTTTTGTCCGGCCC  | 319 | 0 |
| ATP5E  | CGGGAGCTCTTGAGCCAAT  | 116 | 0 |
| ATP5E  | GCCGGGTAATACGGAAGGT  | 34  | 0 |
| ATP5E  | TATTGGCTCCAAGAGCTCCC | 26  | 0 |
| ATP5E  | AGCTCTTGAGCCAATAGGT  | 32  | 0 |
| ATP5E  | CTCAGTGGTCCTTAGCGAGC | 87  | 0 |
| ATP5E  | TCAGTGGTCCTTAGCGAGCG | 87  | 0 |
| ATP5E  | GGGGTAATACGGAAGGTCGG | 66  | 0 |
| ATP5E  | ACCTCCGTATTACCCCGGC  | 109 | 0 |
| ATP5E  | TTGCGCCCGCTCAGGGAAA  | 27  | 0 |
| ATP5E  | CGGGGTAATACGGAAGGTCG | 17  | 0 |
| ATP5F1 | ATTCTAGTGGCCTCCGATTC | 84  | 0 |
| ATP5F1 | ACAAGCTGTCAGCGCGTGAA | 200 | 0 |
| ATP5F1 | CTCCATTCTACCGTTCCACC | 164 | 0 |
| ATP5F1 | TAGTGACTCACCTGAATCGG | 78  | 0 |
| ATP5F1 | TCCATTCTACCGTTCCACCC | 107 | 0 |
| ATP5F1 | GGATAGTGACTCACCTGAAT | 240 | 0 |
| ATP5F1 | CCATTCTACCGTTCCACCCG | 103 | 0 |
| ATP5F1 | TGGCTGACCTCACTTGGGTT | 0   | 0 |
| ATP5F1 | AGCTTGTACCCCCGTAGAT  | 80  | 0 |
| ATP5F1 | GGTAGAAGGGTTCGCCTCCA | 218 | 0 |
| ATP5G1 | CATCGATTCCCCACTCTTAT | 189 | 0 |
| ATP5G1 | ATTGGTAGTTGCGCTGAGGG | 39  | 0 |
| ATP5G1 | TTTGGCCCCGAGCCTTCATT | 494 | 0 |
| ATP5G1 | TGCGGAAAGCCAATAAGAGT | 88  | 0 |
| ATP5G1 | CCATCTTGTGCGCGAGGTTA | 78  | 0 |
| ATP5G1 | TGGCAATTCGCGCTCCATG  | 0   | 0 |
| ATP5G1 | GAATCGATGACGTCAACCAA | 148 | 0 |
| ATP5G1 | GAAACGCTCGACCATAGAGT | 29  | 0 |
| ATP5G1 | TAATATCCCCGCGTCCCCAT | 112 | 0 |
| ATP5G1 | GAGCCTTCATTGCGGCGCTT | 126 | 0 |
| ATP5G2 | CCTAGGAAGATGATCTCCTT | 207 | 0 |
| ATP5G2 | AGTCTATTCTTGCTGCCCCA | 217 | 0 |

|        |                      |     |   |
|--------|----------------------|-----|---|
| ATP5G2 | GGTCAAGAAGTGTAAGACTG | 0   | 0 |
| ATP5G2 | TCCTAGGAAGATGATCTCCT | 41  | 0 |
| ATP5G2 | TCTGTTGGGGGAGAAACAA  | 29  | 0 |
| ATP5G2 | CCCAAGGAGATCATCTTCCT | 98  | 0 |
| ATP5G2 | GGGGCAGCAAGAATAGACTA | 116 | 0 |
| ATP5G2 | CTGTTGGGGGAGAAACAAT  | 43  | 0 |
| ATP5G2 | TGGGGCAGCAAGAATAGACT | 142 | 0 |
| ATP5G2 | CTAGGAAGATGATCTCCTTG | 73  | 0 |
| ATP5G3 | CTTCTTTGAGATCTACGTGG | 152 | 0 |
| ATP5G3 | TTTTAGCACCAGAGTCCATG | 70  | 0 |
| ATP5G3 | CTACTTCTTTGAGATCTACG | 41  | 0 |
| ATP5G3 | TTAAAAATTAGCAGGTGTGG | 21  | 0 |
| ATP5G3 | ATAAAATGCCTCATGGACTC | 84  | 0 |
| ATP5G3 | AATTTAAAAATTAGCAGGTG | 32  | 0 |
| ATP5G3 | TTTACAAATAAAATGCCTCA | 63  | 0 |
| ATP5G3 | CATCTCTTTTTTTTGAGACA | 17  | 0 |
| ATP5G3 | TAGTAATACATAACTAAAAC | 0   | 0 |
| ATP5G3 | ATTTGAAGCTATTAAGTTTT | 25  | 0 |
| ATP5H  | AAAAAATTAGCCAGGCATGG | 0   | 0 |
| ATP5H  | GGCTTGAGCTTGGGAGGCAG | 151 | 0 |
| ATP5H  | AGCCAGGCATGGTGGTGCTG | 50  | 0 |
| ATP5H  | TTTTGTCAATTGCTCAGGC  | 179 | 0 |
| ATP5H  | CGAAAATTTATCAGGTGTGG | 0   | 0 |
| ATP5H  | GTGGGAGGAAGGCTTGAGCC | 46  | 0 |
| ATP5H  | CCCAGTTACTCGGGGGGATG | 0   | 0 |
| ATP5H  | AAATTTATCAGGTGTGGTGG | 65  | 0 |
| ATP5H  | AAAAAAGAAGAGCAGAGAGG | 22  | 0 |
| ATP5H  | TGGGAGGAAGGCTTGAGCCC | 43  | 0 |
| ATP5I  | TGCAGGTTGTGCTTCCGGTG | 36  | 0 |
| ATP5I  | TCCGCTCATCAAGGTGATCC | 113 | 0 |
| ATP5I  | CCGTCTGCAGGTTGTGCTTC | 83  | 0 |
| ATP5I  | GCAGGTCTCTCCGCTCATCA | 372 | 0 |
| ATP5I  | TGCGGAGGTCAGGGACAAGA | 198 | 0 |
| ATP5I  | ATGAGCGGAGAGACCTGCAC | 38  | 0 |
| ATP5I  | CGCACAAGCCAGCAAAGCCT | 68  | 0 |
| ATP5I  | GCCTGGATCACCTTGATGAG | 23  | 0 |

|        |                       |     |   |
|--------|-----------------------|-----|---|
| ATP5I  | CCGGAAGCACAACTGCAGA   | 121 | 0 |
| ATP5I  | CAAGGCTTTGCTGGCTTGTG  | 118 | 0 |
| ATP5J  | CTTCGATAACCCTAACGAAC  | 0   | 0 |
| ATP5J  | GGGTCCAGGACTACAACCTCC | 110 | 0 |
| ATP5J  | CAGGACTACAACCTCCCGGCA | 43  | 0 |
| ATP5J  | TCGGAGGGGAGCTTGAACATA | 33  | 0 |
| ATP5J  | AGTTGTAGTCTGGACCCGA   | 0   | 0 |
| ATP5J  | CGGAGGGGAGCTTGAACATAG | 66  | 0 |
| ATP5J  | GTACGCATGCGCTCTTTGAG  | 151 | 0 |
| ATP5J  | AGTCAGCGTCTGTTGTTA    | 67  | 0 |
| ATP5J  | GAGTCAGCGTCTGTTGTT    | 49  | 0 |
| ATP5J  | GAACAGGACGCTGACTCGGA  | 37  | 0 |
| ATP5J2 | ATGGCCTTCTAGTAGTTCCA  | 198 | 0 |
| ATP5J2 | CATGGCCTTCTAGTAGTTCC  | 129 | 0 |
| ATP5J2 | TCTGCTCTACGCCCTGGAT   | 99  | 0 |
| ATP5J2 | CCTGGGCTCTCTACCTTAAA  | 76  | 0 |
| ATP5J2 | CCTGGACAGCAAAAATCCGA  | 31  | 0 |
| ATP5J2 | GGTCACAACCTGCGAACACCC | 97  | 0 |
| ATP5J2 | GGCTCTCTACCTTAAAAGGT  | 101 | 0 |
| ATP5J2 | CGGCCTCTTCCACCTTTTA   | 224 | 0 |
| ATP5J2 | ACTAGAAGGCCATGAAGCGA  | 35  | 0 |
| ATP5J2 | GGGCTCTCTACCTTAAAAGG  | 0   | 0 |
| ATP5L  | TACAGCACTTTGGGGAGATT  | 73  | 0 |
| ATP5L  | CCAAAGTGCTGTATCACGAT  | 75  | 0 |
| ATP5L  | CCAATCGTGATACAGCACTT  | 122 | 0 |
| ATP5L  | AAAGGGCTATGGGTTGAGCC  | 3   | 0 |
| ATP5L  | ATACAGCACTTTGGGGAGAT  | 51  | 0 |
| ATP5L  | TTTAAAAGGGCTATGGGGCC  | 15  | 0 |
| ATP5L  | ACAACAATCGCTGGAACCCG  | 42  | 0 |
| ATP5L  | CAACAATCGCTGGAACCCGG  | 135 | 0 |
| ATP5L  | ACAGTCTCGCTCTGTCGCCC  | 0   | 0 |
| ATP5L  | CAATCGTGATACAGCACTTT  | 261 | 0 |
| ATP5O  | AACTACAACCTCCAGCCCGA  | 50  | 0 |
| ATP5O  | GAACTACAACCTCCAGCCCG  | 0   | 0 |
| ATP5O  | ACACTTCCAGAGAACCTAG   | 226 | 0 |
| ATP5O  | GCTGTAGGTCAAACCCGAGT  | 0   | 0 |

|          |                      |     |      |
|----------|----------------------|-----|------|
| ATP50    | ATTCTACAGTGAGCGCCGCT | 66  | 0    |
| ATP50    | GATGCAGGCTTTAGCATGCT | 108 | 0    |
| ATP50    | GCGTAACCGCTAGGTTCTCT | 44  | 0    |
| ATP50    | GGCGTAACCGCTAGGTTCTC | 0   | 0    |
| ATP50    | AGTGGTAAGGGCTGGACCCT | 100 | 0    |
| ATP50    | CAGGCTTTAGCATGCTGGGA | 30  | 0    |
| ATP6AP1  | GGTTGGCTGTACGTGTCTCC | 106 | 0    |
| ATP6AP1  | GCACTTGGTCCAATTACCTG | 69  | 0    |
| ATP6AP1  | CCGACTAGGACGAGACAAGA | 0   | 0    |
| ATP6AP1  | GACCAAGTGCATGCCACTCG | 325 | 0    |
| ATP6AP1  | CCCTCTGTCTCGTCCTAGT  | 39  | 0    |
| ATP6AP1  | ACCGACTAGGACGAGACAAG | 76  | 0    |
| ATP6AP1  | CTCGTCTAGTCGGTCTAGC  | 46  | 0    |
| ATP6AP1  | CTCACGCTCCGAGTGGGAAA | 111 | 0    |
| ATP6AP1  | CGTACAGCCAACCAGTGAGA | 58  | 0    |
| ATP6AP1  | TCGTCCTAGTCGGTCTAGCT | 44  | 0    |
| ATP6V0A1 | AATGAGGTCATTGCGGGGGC | 45  | 0    |
| ATP6V0A1 | ATACAGCACAGGGGCCAACA | 157 | 0    |
| ATP6V0A1 | CTTACCCCTTATACTGGGGT | 28  | 0    |
| ATP6V0A1 | CAACTGCAATGAGGTCATTG | 249 | 0    |
| ATP6V0A1 | TGTGCTGTATCTCCACGCTG | 78  | 0    |
| ATP6V0A1 | CAGCGTGGAGATACAGCACA | 129 | 0    |
| ATP6V0A1 | AACTGCAATGAGGTCATTGC | 54  | 0    |
| ATP6V0A1 | AGCGTGGAGATACAGCACAG | 107 | 0    |
| ATP6V0A1 | ACAACCTACCCAGTATAAG  | 76  | 0    |
| ATP6V0A1 | ACCTCATTGCAGTTGGCCAA | 32  | 0    |
| ATP6V0A2 | CTAGGAACGGGTGAGCTTCG | 76  | 0    |
| ATP6V0A2 | AACCTCGGGCGTCCATTGGT | 194 | 0    |
| ATP6V0A2 | CGAGACTCCTCCAGGAAAGC | 0   | 0    |
| ATP6V0A2 | CAGGGTCGTGCACTAGGAAC | 74  | 0    |
| ATP6V0A2 | ACGCAGAGCTAAATCCCGCG | 181 | 0    |
| ATP6V0A2 | ATTTAGCTCTGCGTCCAGTC | 129 | 1560 |
| ATP6V0A2 | ACAGGGTCGTGCACTAGGAA | 195 | 0    |
| ATP6V0A2 | GGAATCTCACGCAGTCCAC  | 88  | 0    |
| ATP6V0A2 | AGACTCCTCCAGGAAAGCCG | 0   | 0    |
| ATP6V0A2 | GAGACTCCTCCAGGAAAGCC | 0   | 0    |

|          |                       |     |   |
|----------|-----------------------|-----|---|
| TCIRG1   | CATTCGCAGGCTCATGGGCT  | 0   | 0 |
| TCIRG1   | TTAATCCCGGAGAGGAGGCC  | 0   | 0 |
| TCIRG1   | ATTCGCAGGCTCATGGGCTT  | 134 | 0 |
| TCIRG1   | TCTCATCTCCTATCCTGAGC  | 121 | 0 |
| TCIRG1   | TATCCTGAGCTGGGCCTGAG  | 106 | 0 |
| TCIRG1   | TGAGGCGCTTAATCCCGGAG  | 80  | 0 |
| TCIRG1   | TCTCCGGGATTAAGCGCCTC  | 100 | 0 |
| TCIRG1   | CCATGAGCCTGCGAATGTTG  | 33  | 0 |
| TCIRG1   | GGTCCTGAGGCGCTTAATCC  | 80  | 0 |
| TCIRG1   | CTTGTGCGCCTCTGGCTGAT  | 67  | 0 |
| ATP6V0A4 | GCTGGAGTCTCACCCATCAG  | 169 | 0 |
| ATP6V0A4 | TTGGCCTTTGCCACAAAGAA  | 84  | 0 |
| ATP6V0A4 | TGCAAAGCACGACAGCCCAG  | 108 | 0 |
| ATP6V0A4 | GGTTGGTCTCGCAAAGGA    | 0   | 0 |
| ATP6V0A4 | GAGTATCTGATCTCCGTCTC  | 0   | 0 |
| ATP6V0A4 | TGCTGGAGTCTCACCCATCA  | 163 | 0 |
| ATP6V0A4 | GAAGATTCTTTGGCCAGGGT  | 134 | 0 |
| ATP6V0A4 | TCATCTGAAGGATTAGGCAG  | 135 | 0 |
| ATP6V0A4 | TATTCATGGCCAGGCTGGGA  | 119 | 0 |
| ATP6V0A4 | GGGGGAAGATTCTTTGGCCA  | 100 | 0 |
| ATP6V0B  | CAGTGAGGTCGCGGTATGGT  | 81  | 0 |
| ATP6V0B  | TGATGGCTCCCATTTTCATTC | 150 | 0 |
| ATP6V0B  | AAGCATCACCAGGACATCGC  | 201 | 0 |
| ATP6V0B  | AGAGGAGCGTTTAAGTGGGG  | 0   | 0 |
| ATP6V0B  | GATGAGCCGCATGTATAGTT  | 214 | 0 |
| ATP6V0B  | AGCCATCAGGGCATTTCGAC  | 49  | 0 |
| ATP6V0B  | TAAGCATCACCAGGACATCG  | 82  | 0 |
| ATP6V0B  | AGCAGAGGAGCGTTTAAGTG  | 95  | 0 |
| ATP6V0B  | GCCATCAGGGCATTTCGACA  | 44  | 0 |
| ATP6V0B  | ACCCTGTCGAAATGCCCTGA  | 273 | 0 |
| ATP6V0C  | GTACAAAGAAAAGCGTCGCC  | 57  | 0 |
| ATP6V0C  | TACCAATCCTGGGCGAGCTA  | 174 | 0 |
| ATP6V0C  | GGTACAAAGAAAAGCGTCGC  | 114 | 0 |
| ATP6V0C  | CTTCATTAGCATACGGGGCG  | 27  | 0 |
| ATP6V0C  | GTCTGCAGGTGTTGGGTCC   | 62  | 0 |
| ATP6V0C  | TAGCTCGCCAGGATTGGTA   | 149 | 0 |

|          |                       |     |   |
|----------|-----------------------|-----|---|
| ATP6V0C  | GCTTCATTAGCATACGGGGC  | 91  | 0 |
| ATP6V0C  | GTGTGCTTCATTAGCATACG  | 123 | 0 |
| ATP6V0C  | TGCTTCATTAGCATACGGGG  | 0   | 0 |
| ATP6V0C  | ACCAATCCTGGGCGAGCTAA  | 181 | 0 |
| ATP6V0D1 | GCTCTGTTGGAAACCTCTAC  | 0   | 0 |
| ATP6V0D1 | CTGAGAAGACTCTGCTCTGT  | 75  | 0 |
| ATP6V0D1 | CTCTCCACATTGTGGCTAGA  | 136 | 0 |
| ATP6V0D1 | GCATGGGATCAAGTTACCCA  | 223 | 0 |
| ATP6V0D1 | TAGTTCCTAGCGCAGTCTGA  | 86  | 0 |
| ATP6V0D1 | TTGAACATAGTCCCGTGGGC  | 127 | 0 |
| ATP6V0D1 | AGGACACATTCCAGATGGAC  | 132 | 0 |
| ATP6V0D1 | GAAGTTTGAACATAGTCCCG  | 35  | 0 |
| ATP6V0D1 | AGCCCCTTCTAGCCACAATG  | 156 | 0 |
| ATP6V0D1 | CTCCACATTGTGGCTAGAAG  | 36  | 0 |
| ATP6V0D2 | ATTCAGCTGACTGCTTAGCT  | 101 | 0 |
| ATP6V0D2 | AAGCTAAGCAGTCAGCTGAA  | 145 | 0 |
| ATP6V0D2 | CCGTTTAAGGCAGCTCTCTA  | 70  | 0 |
| ATP6V0D2 | CATAGCTTTACATCCCTGAG  | 96  | 0 |
| ATP6V0D2 | AGGCAACCTTGCTGCAGCTC  | 53  | 0 |
| ATP6V0D2 | AGGGGCACTATCTCCGTTTA  | 104 | 0 |
| ATP6V0D2 | TTCTATGACCCTTGTCACCA  | 73  | 0 |
| ATP6V0D2 | CCTTAGAGAGCTGCCTTAAA  | 197 | 0 |
| ATP6V0D2 | GTAGAAGGAGGGGATAGAGC  | 22  | 0 |
| ATP6V0D2 | AGGAGGGGATAGAGCAGGAG  | 114 | 0 |
| ATP6V1A  | TCTTAAACTTGAGGCGTGC   | 96  | 0 |
| ATP6V1A  | GGAGCTCGACGTCATGTGAC  | 0   | 0 |
| ATP6V1A  | TCGACGTCATGTGACTGGTT  | 218 | 0 |
| ATP6V1A  | AGAGCCTGGAATTTTACCGG  | 136 | 0 |
| ATP6V1A  | ATTTTACCGCGGACTCCAG   | 91  | 0 |
| ATP6V1A  | TGGAGGGTAGCCAATCTATC  | 111 | 0 |
| ATP6V1A  | AAAACCTTGAGGCGTGCTGGA | 165 | 0 |
| ATP6V1A  | TTGGCCCAAACCTCAGAGCC  | 189 | 0 |
| ATP6V1A  | TGACGTTACGCCACAATCG   | 35  | 0 |
| ATP6V1A  | TCCCAGCGCTCTACATCTCG  | 200 | 0 |
| ATP6V1B1 | GTTTACTGTCAACCTAGAGG  | 0   | 0 |
| ATP6V1B1 | TCCTCCAGCTCTCAGGTGAC  | 0   | 0 |



|          |                        |     |   |
|----------|------------------------|-----|---|
| ATP6V1B1 | CATACAGTTTGGGGTTGGCG   | 80  | 0 |
| ATP6V1B1 | TACTGTCAACCTAGAGGAGG   | 96  | 0 |
| ATP6V1B1 | GACCTGCACAGCTTGGTGTG   | 170 | 0 |
| ATP6V1B1 | GAACCGCCTAGCACAGAAGA   | 62  | 0 |
| ATP6V1B1 | TCATACAGTTTGGGGTTGGC   | 45  | 0 |
| ATP6V1B1 | CACACCAAGCTGTGCAGGTC   | 45  | 0 |
| ATP6V1B1 | TGACAGCACCTGATGGTCCA   | 231 | 0 |
| ATP6V1B1 | AGCCTGCCAGAAGTTGGGTG   | 27  | 0 |
| ATP6V1B2 | CAGACCTGCTTGCGAGCAAG   | 23  | 0 |
| ATP6V1B2 | TCACGAAAGCCCATTCGAAA   | 33  | 0 |
| ATP6V1B2 | AGATATAACCAAGGCGGCCCCG | 47  | 0 |
| ATP6V1B2 | CCGCTTGTGCGCCTCTCTTT   | 124 | 0 |
| ATP6V1B2 | TTGTGCGCCTCTCTTTCGGC   | 245 | 0 |
| ATP6V1B2 | CACGCGCAGATATAACCAAGG  | 0   | 0 |
| ATP6V1B2 | AGCTCCTCTTGCTCGCAAGC   | 123 | 0 |
| ATP6V1B2 | CTCTTGCTCGCAAGCAGGTC   | 131 | 0 |
| ATP6V1B2 | CCGAAAGAGAGGCGCACAAG   | 0   | 0 |
| ATP6V1B2 | TGGGCTTTCGTGACGCTGAA   | 215 | 0 |
| ATP6V1C1 | GGCAAGGGGACCCTATATTC   | 88  | 0 |
| ATP6V1C1 | CAGCGATCAGCCCCGAATAT   | 39  | 0 |
| ATP6V1C1 | AGCGATCAGCCCCGAATATA   | 38  | 0 |
| ATP6V1C1 | TGATCGCTGTTGTTCCAGAG   | 285 | 0 |
| ATP6V1C1 | GTAAACGTCAGCGCCACTGC   | 0   | 0 |
| ATP6V1C1 | TGACCCGCAGAAACCTGCAG   | 34  | 0 |
| ATP6V1C1 | ATTGTCTCCAACCCCCTACA   | 165 | 1 |
| ATP6V1C1 | GCGCTGACGTTTACAAGTGG   | 0   | 0 |
| ATP6V1C1 | GCTTCTCCAGTGTTGCAAG    | 34  | 0 |
| ATP6V1C1 | CGCTGTTGTTCCAGAGTGGG   | 39  | 0 |
| ATP6V1C2 | GCCCGTATGCAAATATCCTG   | 63  | 0 |
| ATP6V1C2 | CCCGCAGGATATTTGCATAC   | 257 | 0 |
| ATP6V1C2 | TGCAAATATCCTGCGGGGCC   | 80  | 0 |
| ATP6V1C2 | ATGCAAATATCCTGCGGGGC   | 212 | 0 |
| ATP6V1C2 | CCGTATGCAAATATCCTGCG   | 49  | 0 |
| ATP6V1C2 | CCAGAGCCCGGATAAAAAGG   | 0   | 0 |
| ATP6V1C2 | CCCCGCAGGATATTTGCATA   | 80  | 0 |
| ATP6V1C2 | AGAGCCCGGATAAAAAGGCG   | 6   | 0 |

|          |                       |     |   |
|----------|-----------------------|-----|---|
| ATP6V1C2 | CCCGTATGCAAATATCCTGC  | 41  | 0 |
| ATP6V1C2 | CGGGAAAAGGCTCTGAGCTC  | 225 | 0 |
| ATP6V1D  | CTTCTCCACCTTTCGTCTT   | 82  | 0 |
| ATP6V1D  | CCTTCGTCGCCTGTGACAAC  | 86  | 0 |
| ATP6V1D  | TGACCCCTCTTGTTGCTAAG  | 226 | 0 |
| ATP6V1D  | GGAATTGAGGGGTGGTTCCG  | 86  | 0 |
| ATP6V1D  | GCTGCCTCTTAGCAACAAGA  | 124 | 0 |
| ATP6V1D  | CACGCTTCGCTCCTAGTCTT  | 135 | 0 |
| ATP6V1D  | CTGTGACCAAAGACGAAAGG  | 10  | 0 |
| ATP6V1D  | CGGTTGTACAGGCGACGAA   | 74  | 0 |
| ATP6V1D  | TCAAGGCGCGAGAAAGACAT  | 0   | 0 |
| ATP6V1D  | TCTTGTTGCTAAGAGGCAGC  | 0   | 0 |
| ATP6V1E1 | TCACGAGTCAGCGACGTAGA  | 88  | 0 |
| ATP6V1E1 | AGGGGTACATGATTGTTGGC  | 120 | 0 |
| ATP6V1E1 | CCTACCCAAGATCCCAGTTT  | 71  | 0 |
| ATP6V1E1 | GCTTAGGGGTACATGATTGT  | 152 | 0 |
| ATP6V1E1 | TTGACCTCAAGTTCGAGACC  | 81  | 0 |
| ATP6V1E1 | TCGCTGACTCGTGACCTGAC  | 43  | 0 |
| ATP6V1E1 | AAACTGGGATCTTGGGTAGG  | 97  | 0 |
| ATP6V1E1 | GCCCGACTAATTCAGATAG   | 282 | 0 |
| ATP6V1E1 | TACACAGGGTTATGGGCTTA  | 77  | 0 |
| ATP6V1E1 | CCTAAACTGGGATCTTGGGT  | 67  | 0 |
| ATP6V1E2 | AGAGGATGGCTCTGGCCTTC  | 21  | 0 |
| ATP6V1E2 | TGACTATTGCGTCATCGTGG  | 27  | 0 |
| ATP6V1E2 | TAGTTCGGTTGTGCACTTAG  | 131 | 0 |
| ATP6V1E2 | CCACGTCTTCTCCAGCATC   | 470 | 0 |
| ATP6V1E2 | GCATGACTATTGCGTCATCG  | 0   | 0 |
| ATP6V1E2 | TTGTGCACTTAGAGGCCGAG  | 101 | 0 |
| ATP6V1E2 | CTCGGCCTCTAAGTGACAAA  | 156 | 0 |
| ATP6V1E2 | GCACTTAGAGGCCGAGAGGA  | 67  | 0 |
| ATP6V1E2 | GAGAAGACGTGGAGGCCTCT  | 38  | 0 |
| ATP6V1E2 | TCAAGGAGGAGAGACCAAAA  | 20  | 0 |
| ATP6V1F  | AGTTACTCATCTCAAGGGCA  | 94  | 0 |
| ATP6V1F  | TGCTGTTAATGCGCATGTCC  | 222 | 0 |
| ATP6V1F  | ACGGCGCAGGCGTATTCACA  | 59  | 0 |
| ATP6V1F  | CATGCGCATTAAACAGCAACA | 149 | 0 |

|          |                       |     |   |
|----------|-----------------------|-----|---|
| ATP6V1F  | AATGCGCATGTCCCGGAATG  | 66  | 0 |
| ATP6V1F  | TTCTGGGAATCGTAGTCCCC  | 0   | 0 |
| ATP6V1F  | GAACGAATGAATGCCCCGCGA | 58  | 0 |
| ATP6V1F  | GTAAGTGCCTCTTCTCTG    | 0   | 0 |
| ATP6V1F  | TAAAGACAGGCCCGAACCAG  | 74  | 0 |
| ATP6V1F  | GCGCAGGCGTATTCACATGG  | 0   | 0 |
| ATP6V1G1 | GGTAGCCATTAAGAGAGGCC  | 17  | 0 |
| ATP6V1G1 | CTACAGAGTGAACCAGCGAC  | 0   | 0 |
| ATP6V1G1 | TACAGAGTGAACCAGCGACA  | 43  | 0 |
| ATP6V1G1 | TCTGTGATTCGGCAGAAATG  | 178 | 0 |
| ATP6V1G1 | GCTCAACGTCAAGAGAGGAG  | 0   | 0 |
| ATP6V1G1 | TCAGCTGATGCTACGCTGTG  | 31  | 0 |
| ATP6V1G1 | CGCTCCCTGGCCTCTTTTAA  | 110 | 0 |
| ATP6V1G1 | CTTCTGTGATTCGGCAGAAA  | 102 | 0 |
| ATP6V1G1 | GCTGTGCGGTACGTGACAA   | 87  | 0 |
| ATP6V1G1 | GAGCAAGCGCAGATTGTGGG  | 0   | 0 |
| ATP6V1G2 | AAAGGTCTAGGGATGAGGCA  | 88  | 0 |
| ATP6V1G2 | CATCCCTAGACCTTCCGAC   | 68  | 0 |
| ATP6V1G2 | TGTCATCATGCAACCTGTGT  | 51  | 0 |
| ATP6V1G2 | ATCCCTAGACCTTCCGACT   | 227 | 0 |
| ATP6V1G2 | GAGGACCAGTCATCAATAGG  | 32  | 0 |
| ATP6V1G2 | GTTAGCCATCCCAGTCGAA   | 58  | 0 |
| ATP6V1G2 | GTGAATGCGGTGAAAAGGTA  | 0   | 0 |
| ATP6V1G2 | CTTGCTCAGGCAGTACCCAA  | 325 | 0 |
| ATP6V1G2 | CTCATCCTCCTATTGATGAC  | 86  | 0 |
| ATP6V1G2 | CTAGACCTTCCGACTGGGA   | 0   | 0 |
| ATP6V1G3 | TCCACCTGGGCTTTCCTT    | 164 | 0 |
| ATP6V1G3 | GACCTGAAACAAAGTACTGC  | 51  | 0 |
| ATP6V1G3 | CTTATTGGGCTGGATAGCT   | 197 | 0 |
| ATP6V1G3 | GCTTATTGGGCTGGATAGC   | 101 | 0 |
| ATP6V1G3 | GTCCAAGGAAAGCCCAAGG   | 0   | 0 |
| ATP6V1G3 | TGGGTCCAAGGAAAGCCCA   | 0   | 0 |
| ATP6V1G3 | ATTCCACCTGGGCTTTCCT   | 82  | 0 |
| ATP6V1G3 | TCAAAGTGGCTTATTGGGC   | 69  | 0 |
| ATP6V1G3 | CTCTTCTGTATGAGATAAGG  | 71  | 0 |
| ATP6V1G3 | TCATACAGAAGAGCTAAGAT  | 27  | 0 |

|         |                       |     |   |
|---------|-----------------------|-----|---|
| ATP6V1H | TGGGCTCCAGATGGGACTGT  | 26  | 0 |
| ATP6V1H | TAAGGCAAAGACAGTTGCTG  | 17  | 0 |
| ATP6V1H | AGTTGCTGAGGCCTGGACTA  | 130 | 0 |
| ATP6V1H | GGAAAATTTGGGCTCCAGAT  | 0   | 0 |
| ATP6V1H | GGGAAAATTTGGGCTCCAGA  | 0   | 0 |
| ATP6V1H | GTTGCTGAGGCCTGGACTAG  | 40  | 0 |
| ATP6V1H | CCCAAATTTCCCTAGTCC    | 33  | 0 |
| ATP6V1H | GTAAGAATGTACTGCCCTGG  | 58  | 0 |
| ATP6V1H | GCCTGGACTAGGGGAAAATT  | 0   | 0 |
| ATP6V1H | GAATAAGAACGCCTGCTTCA  | 104 | 0 |
| ATP7A   | AAGTGGGGGTAGTCGAGGGA  | 58  | 0 |
| ATP7A   | CTGGTTTCGCTTTTGTCTGTG | 320 | 0 |
| ATP7A   | GAGCGACTGGTCACGTGAAA  | 86  | 0 |
| ATP7A   | CCCTAACAAAGACCCACTCG  | 79  | 0 |
| ATP7A   | TTACATCTTGGCCTGAGGTT  | 123 | 0 |
| ATP7A   | TTCGCTTTTGTCTGGGGGC   | 1   | 0 |
| ATP7A   | TCTGGTTTCGCTTTTGTCTGT | 95  | 0 |
| ATP7A   | AGTCGCTCTCTTCCCGTGG   | 334 | 0 |
| ATP7A   | CCTCGAGTGGGTCTTTGTTA  | 302 | 0 |
| ATP7A   | TTCTGGTTTCGCTTTTGTCTG | 118 | 0 |
| ATP7B   | GCGCTGCAGCAGACGATGAT  | 13  | 0 |
| ATP7B   | TGAGCTAGCCTCCAGCTTTG  | 199 | 0 |
| ATP7B   | CTGAGCTAGCCTCCAGCTTT  | 36  | 0 |
| ATP7B   | CAGGATGACTGGACATATCC  | 120 | 0 |
| ATP7B   | TGACGTCCGACAAGCCATCT  | 162 | 0 |
| ATP7B   | CCTGGCTGACATAGCTGACC  | 31  | 0 |
| ATP7B   | GAGATGGCTTGTCTGGACGTC | 108 | 0 |
| ATP7B   | CCACTCACCACAAGCTGAGC  | 115 | 0 |
| ATP7B   | TGGCTGTCCTGCTCAGCTTG  | 358 | 0 |
| ATP7B   | CGCTGCAGCAGACGATGATG  | 66  | 0 |
| ATP8A1  | GGTTGGGTTAGACAGTTTCA  | 58  | 0 |
| ATP8A1  | ACTGTCTAACCCAACCCCTA  | 67  | 0 |
| ATP8A1  | GGGTTGGGTTAGACAGTTTC  | 0   | 0 |
| ATP8A1  | CTAACCCAACCCCTAAGGTA  | 63  | 0 |
| ATP8A1  | TGTTCCCTACCTTAGGGGTT  | 169 | 0 |
| ATP8A1  | CTGTTCCCTACCTTAGGGGT  | 103 | 0 |

|        |                      |     |   |
|--------|----------------------|-----|---|
| ATP8A1 | AGTAAAAACAGCCTGGGCA  | 60  | 0 |
| ATP8A1 | CTTTGGGAGGCCAAGGCTGG | 236 | 0 |
| ATP8A1 | AGAATCTGTTCTTACCTTA  | 333 | 0 |
| ATP8A1 | AAAGTCAGTTAAAAACAGCC | 31  | 0 |
| ATP8A2 | GGGCTTTTAGGTGTCGGGGA | 35  | 0 |
| ATP8A2 | AGATTGGGCTGTACTTTTCG | 83  | 0 |
| ATP8A2 | GTACTTTCGGGGGCTCTTCC | 34  | 0 |
| ATP8A2 | CAGGTAAATAGGTAGCAGAC | 0   | 0 |
| ATP8A2 | TCCGCAATATTACGCAGGAC | 68  | 0 |
| ATP8A2 | GAGATTGGGCCTGTACTTTC | 181 | 0 |
| ATP8A2 | CCCGGTCCTGCGTAATATTG | 35  | 0 |
| ATP8A2 | CACTTGTCTGTGCAAGTGG  | 42  | 0 |
| ATP8A2 | GATTGGGCTGTACTTTCGG  | 75  | 0 |
| ATP8A2 | TCCCCGACACCTAAAAGCCC | 0   | 0 |
| ATP8B1 | GGGGCATTGTAGCAGCATGC | 27  | 0 |
| ATP8B1 | TATGACTCTGCCAGTTTT   | 192 | 0 |
| ATP8B1 | GCAAGAGTCATAATCACTC  | 82  | 0 |
| ATP8B1 | TCATGTCAAGTTGAATTTGG | 257 | 0 |
| ATP8B1 | GCAGTATTCAACCAAAAAC  | 0   | 0 |
| ATP8B1 | GGCAGTATTCAACCAAAAAC | 0   | 0 |
| ATP8B1 | GTTTCTCTTCTTTTAAGC   | 0   | 0 |
| ATP8B1 | ATTGGAACACTGCTTAAA   | 169 | 0 |
| ATP8B1 | TTCAGTACTGATTAATGCT  | 65  | 0 |
| ATP8B1 | TCTTCATGTCAAGTTGAATT | 223 | 0 |
| ATP8B2 | TGCGGATGGACGTACGTGTG | 110 | 0 |
| ATP8B2 | CGGCAGGAGAGCTGTAGAAG | 86  | 0 |
| ATP8B2 | ATGCGGATGGACGTACGTGT | 259 | 0 |
| ATP8B2 | GTCTTAGCCCTCCGAGCCT  | 163 | 0 |
| ATP8B2 | CAAAACGAGCATCCTCTGCA | 27  | 0 |
| ATP8B2 | GAGGCTAGATCGCTCTGAGG | 43  | 0 |
| ATP8B2 | GATGCGGATGGACGTACGTG | 0   | 0 |
| ATP8B2 | CCTGGCGCCAGGGAAAATTC | 71  | 0 |
| ATP8B2 | CCAGAATTTTCCCTGGCGCC | 106 | 0 |
| ATP8B2 | GCAAAACGAGCATCCTCTGC | 75  | 0 |
| ATP8B3 | AGAAGGAAGGCGAGGACGAG | 142 | 0 |
| ATP8B3 | GCAAAGTCAGAGTAGGGGCG | 28  | 0 |

|        |                      |     |   |
|--------|----------------------|-----|---|
| ATP8B3 | TAGTCCCTCCCCAAAGTCC  | 195 | 0 |
| ATP8B3 | AGGCCGGGATAGAAGACGCT | 60  | 0 |
| ATP8B3 | CTCCCAGCGTCTTCTATCC  | 52  | 0 |
| ATP8B3 | CGCTGAGCAAAGTCAGAGTA | 87  | 0 |
| ATP8B3 | AAGGGACTAGAAGGAAGGCG | 0   | 0 |
| ATP8B3 | AACTGGCTCCACCTTCGCCT | 298 | 0 |
| ATP8B3 | TCGCTGAGCAAAGTCAGAGT | 50  | 0 |
| ATP8B3 | AGCAAAGTCAGAGTAGGGGC | 35  | 0 |
| ATP8B4 | AGCACATCATGTGCAGCCAA | 18  | 0 |
| ATP8B4 | ATTGGCTGCACATGATGTGC | 0   | 0 |
| ATP8B4 | GCACATCATGTGCAGCCAAT | 24  | 0 |
| ATP8B4 | GACCTCTCATGAATCTCTCT | 89  | 0 |
| ATP8B4 | CTCCAAGAGAGATTCATGAG | 134 | 0 |
| ATP8B4 | ATCCCAGCCTCCTTCTCACC | 321 | 0 |
| ATP8B4 | AATTAACTTCTGGGGCCCAT | 63  | 0 |
| ATP8B4 | GCTAGGCTCAAACCAAGCCC | 0   | 0 |
| ATP8B4 | ATTTGGGATTCCAGGTGAGA | 100 | 0 |
| ATP8B4 | GCCCCAGAAGTTAATTGTCA | 11  | 0 |
| ATP9A  | GATGTTGTCCGTCATGTCGG | 195 | 0 |
| ATP9A  | CGGGATGTTGTCCGTCATGT | 113 | 0 |
| ATP9A  | GACGGACACGGGCGCACCAT | 39  | 0 |
| ATP9A  | CATGGTGCGCCGTGTCCGT  | 310 | 0 |
| ATP9A  | TTCTGGCGCACCGGCTGCAG | 149 | 0 |
| ATP9A  | GGACAACATCCCGCTGCAGC | 87  | 0 |
| ATP9A  | CAGCGCGGAGCTCGGGCCCA | 24  | 0 |
| ATP9A  | CGCTGCAGTGTCCCCGCCCC | 282 | 0 |
| ATP9A  | TGCGCCCGTGTCCGTCGGTC | 150 | 0 |
| ATP9A  | CGCGGCCCGACCGACGGACA | 218 | 0 |
| ATP10A | GCGCGCGTTTGCAGCGTTTT | 33  | 0 |
| ATP10A | CCGAGCTGGAAACTTCAGAG | 0   | 0 |
| ATP10A | TTGTTTCCCGCTATCCGGCG | 56  | 0 |
| ATP10A | TGGGACCGAACTGATGCTTC | 40  | 0 |
| ATP10A | GAAACAAAAAAGCCCGAGC  | 91  | 0 |
| ATP10A | AAACCGCGAAGCGCGAGAAA | 90  | 0 |
| ATP10A | GGGACCGAACTGATGCTTCT | 92  | 0 |
| ATP10A | AGCGCGCGTTTGCAGCGTTT | 159 | 0 |

|        |                      |     |   |
|--------|----------------------|-----|---|
| ATP10A | GGTTTCCTCTCTCCTACTGC | 139 | 0 |
| ATP10A | GTTTCCCAGAAGCATCAGTT | 53  | 0 |
| ATP10B | GAACACTGCCTTCACTGTTC | 107 | 0 |
| ATP10B | GAAGGCAGTGTCTTCGACT  | 70  | 0 |
| ATP10B | TTGCTGGCTCATTGATTCAC | 97  | 0 |
| ATP10B | GCCGAGTCCCAGAACAGTGA | 224 | 0 |
| ATP10B | AACCTTGCAGTTCTCTTTGG | 81  | 0 |
| ATP10B | GATTCAGCTGCTGGGTTTCA | 0   | 0 |
| ATP10B | GCCTTCACTGTTCTGGGACT | 251 | 0 |
| ATP10B | GCCCCCAAAGAGAACTGCA  | 58  | 0 |
| ATP10B | AACACTGCCTTCACTGTTCT | 138 | 0 |
| ATP10B | ATTCAGCTGCTGGGTTTCAA | 62  | 0 |
| ATP10D | TCGGTCAAACAGCTGGAGCT | 75  | 0 |
| ATP10D | ACCGCGAGCAACCTGTACTT | 130 | 0 |
| ATP10D | TGTAAGGGCTCTGGGTCACT | 114 | 0 |
| ATP10D | ATTGGCGGTGCACTGCAGCT | 70  | 0 |
| ATP10D | AGGTGAGATTGTAAGGGCTC | 15  | 0 |
| ATP10D | GCGAGCAACCTGTACTTGGG | 26  | 0 |
| ATP10D | CTCGGTCAAACAGCTGGAGC | 41  | 0 |
| ATP10D | GGTGAGATTGTAAGGGCTCT | 109 | 0 |
| ATP10D | TACAGGTTGCTCGCGGTTGA | 348 | 0 |
| ATP10D | AACCGCGAGCAACCTGTACT | 164 | 0 |
| ATP11A | GTCGGCAGCTGCTCCACTGG | 61  | 0 |
| ATP11A | GGCAGGGGAGGAGGAGACTC | 57  | 0 |
| ATP11A | ACTCGGGAGGAGCAGAGCGC | 33  | 0 |
| ATP11A | GGCGCCTTCTCTCCCCGT   | 32  | 0 |
| ATP11A | CTGGCGGCAAGGCTGCTGCT | 127 | 0 |
| ATP11A | CAGCTGCTCCACTGGCGGCA | 184 | 0 |
| ATP11A | TCCAGCCGAGCCCAACCGAG | 106 | 0 |
| ATP11A | TGGCGGCAAGGCTGCTGCTC | 0   | 0 |
| ATP11A | AGGGGAGGAGGAGACTCGGG | 0   | 0 |
| ATP11A | AGCAGCAGCCTTGCCGCCAG | 26  | 0 |
| ATP11B | CATCTCCGGAGTCTGCAGCT | 0   | 0 |
| ATP11B | AGAAACAGCGTTCGAGAACC | 0   | 0 |
| ATP11B | GCAACAGGAGGTAGAGACCG | 0   | 0 |
| ATP11B | TTAAGTCGTGTCTGTGGGTC | 112 | 0 |

|         |                       |     |   |
|---------|-----------------------|-----|---|
| ATP11B  | CAGGTCTTTTTCGGGCTCTG  | 86  | 0 |
| ATP11B  | TGGGATTAAGTCGTGTCTGT  | 57  | 0 |
| ATP11B  | TTAATCCCACTCCCAGAACG  | 0   | 0 |
| ATP11B  | AAGCGAGCGTGGAAAGGTGC  | 0   | 0 |
| ATP11B  | GTGGGATTAAGTCGTGTCTG  | 79  | 0 |
| ATP11B  | GCCCGAAAAAGACCTGCAAC  | 42  | 0 |
| ATP11C  | TTCAACCCTCTGGGCAAACC  | 286 | 0 |
| ATP11C  | CGAATCCTGGGAGCTTTCCC  | 28  | 0 |
| ATP11C  | ACGGTTGGACTACAACCTCC  | 42  | 0 |
| ATP11C  | TCGGTAGCCTTCCTAGCGGT  | 81  | 0 |
| ATP11C  | CGCAAATTCAGCTCTAAGC   | 0   | 0 |
| ATP11C  | AAATTCAGCTCTAAGCTGG   | 116 | 0 |
| ATP11C  | TAGGCAAAGCTCCGAATCCT  | 117 | 0 |
| ATP11C  | TGCGCACATTTTGC GTTCCA | 208 | 0 |
| ATP11C  | CAAACCCGGGACTAGCGTGT  | 30  | 0 |
| ATP11C  | AGGGTTGAAGAAGGAAGCGC  | 0   | 0 |
| ATP12A  | GTCGGGAGAGTCCAGGATTG  | 242 | 0 |
| ATP12A  | TTAGTAGCCGAACGCCAGG   | 27  | 0 |
| ATP12A  | TAAAGGGAAGGGGATTCCCA  | 76  | 0 |
| ATP12A  | CCCTGGCGTTCGGCTACTAA  | 145 | 0 |
| ATP12A  | CCTGGCGTTCGGCTACTAAA  | 90  | 0 |
| ATP12A  | CCCTTAGTAGCCGAACGCC   | 34  | 0 |
| ATP12A  | CCTTAGTAGCCGAACGCCA   | 210 | 0 |
| ATP12A  | CGTTCGGCTACTAAAGGGAA  | 36  | 0 |
| ATP12A  | AGTACAGCCCTGGTTCGCT   | 187 | 0 |
| ATP12A  | CTAAAGGGAAGGGGATTCCC  | 105 | 0 |
| ATP13A1 | TTAGGGTGTGAGGTGAAATG  | 164 | 0 |
| ATP13A1 | TCCACGGAGGGGAAGATTGC  | 177 | 0 |
| ATP13A1 | TGAGGTCTCCTTAGGGTGTC  | 53  | 0 |
| ATP13A1 | CTTAGGGTGTGAGGTGAAAT  | 135 | 0 |
| ATP13A1 | AGTCTGGGAACTGCCTCAC   | 121 | 0 |
| ATP13A1 | CCTTAGGGTGTGAGGTGAAA  | 76  | 0 |
| ATP13A1 | CCATTCACCTGACACCCTA   | 306 | 0 |
| ATP13A1 | AAGTCTGGGAACTGCCTCA   | 0   | 0 |
| ATP13A1 | TCTTGCCAATGCCCTGAG    | 62  | 0 |
| ATP13A1 | TCAGGTGAAATGGGGAAGTC  | 47  | 0 |



|         |                      |     |   |
|---------|----------------------|-----|---|
| ATP13A2 | GACCGGAGACACACACCTCA | 147 | 0 |
| ATP13A2 | GCCTGGAAGACATGGAGAGC | 0   | 0 |
| ATP13A2 | CACGCACAGTCCCTAACCAC | 219 | 0 |
| ATP13A2 | TGGTTAGGGACTGTGCGTGC | 53  | 0 |
| ATP13A2 | CCAGCACGTCCCAGTGGTTA | 176 | 0 |
| ATP13A2 | ACGCACAGTCCCTAACCACT | 1   | 0 |
| ATP13A2 | TAACCACTGGGACGTGCTGG | 113 | 0 |
| ATP13A2 | CTCCGTGAGGTGTGTGTCTC | 27  | 0 |
| ATP13A2 | TCCAGCTCTCCATGTCTTCC | 113 | 0 |
| ATP13A2 | GCCTGCTCCTCCGCACACAC | 140 | 0 |
| ATP13A4 | GTAGTTGGACCACTTTGCCA | 200 | 0 |
| ATP13A4 | GGCAGGGTGCAGTGTTGACT | 129 | 0 |
| ATP13A4 | CAGCGTCATCTCAAGCTCCA | 58  | 0 |
| ATP13A4 | TCCACAGGAAATGAGTGCCT | 77  | 0 |
| ATP13A4 | AAGGCACTCATTTCTGTGG  | 226 | 0 |
| ATP13A4 | GCGTCATCTCAAGCTCCAAG | 61  | 0 |
| ATP13A4 | TTGAACCTGTGCACTGCCTC | 129 | 0 |
| ATP13A4 | GCAACGTACAGCTTCCCCTC | 77  | 0 |
| ATP13A4 | TGCCAAGGCATTGTTTCTTC | 100 | 0 |
| ATP13A4 | CACTGCCTCTGGTAATGCAG | 63  | 0 |
| ATP13A5 | GGAATGACGGGGGAAGAAGT | 56  | 0 |
| ATP13A5 | CAAGACCTGAGGAATGACGG | 0   | 0 |
| ATP13A5 | CCTCAAGACCTGAGGAATGA | 101 | 0 |
| ATP13A5 | CCGTCATTCTCAGGTCTTG  | 246 | 0 |
| ATP13A5 | GGGGTGACAATGAGAATTGA | 0   | 0 |
| ATP13A5 | TATGAGTGCCTCAAGACCTG | 30  | 0 |
| ATP13A5 | TTCTCCCCCGTCATTCTC   | 40  | 0 |
| ATP13A5 | TCAAGACCTGAGGAATGACG | 126 | 0 |
| ATP13A5 | CTCAAGACCTGAGGAATGAC | 45  | 0 |
| ATP13A5 | AGAATTGAAGGAAGGGAGGT | 0   | 0 |
| SV2A    | TGAGCATCGGGAGAGACCAT | 113 | 0 |
| SV2A    | ATACTGAGACTGGGGTGCTA | 68  | 0 |
| SV2A    | TTACTAGGAAGGGCCTGGGA | 0   | 0 |
| SV2A    | GCAGGACCCAATAATTCAG  | 262 | 0 |
| SV2A    | GGTCCTGCCATACTGAGACT | 29  | 0 |
| SV2A    | GCATCGGGAGAGACCATTGG | 0   | 0 |

|        |                      |     |   |
|--------|----------------------|-----|---|
| SV2A   | GCTGTTCTTGACAACTC    | 36  | 0 |
| SV2A   | TACTAGGAAGGGCCTGGGAA | 29  | 0 |
| SV2A   | GAATAGGAGCACTCTGGATT | 166 | 0 |
| SV2A   | CACGGGGAGAAATGATGAAA | 0   | 0 |
| NPC1L1 | ACCCTGGCCTGACTGGGTTA | 141 | 0 |
| NPC1L1 | ACCCTAGCACCTGCGTGATG | 92  | 0 |
| NPC1L1 | CCTCTGGCTTCGGTCGCTTT | 131 | 0 |
| NPC1L1 | ACTGTTTGGCCCCAGTCCAC | 85  | 0 |
| NPC1L1 | ATGACAACCCTGGCCTGACT | 45  | 0 |
| NPC1L1 | AGGCCAGGGTTGTCATCGAA | 104 | 0 |
| NPC1L1 | ATGAGGCTCATCTAAAGCGG | 49  | 0 |
| NPC1L1 | TTAGATGAGCCTCATCACGC | 75  | 0 |
| NPC1L1 | TCATCTAAAGCGGGGCCTG  | 62  | 0 |
| NPC1L1 | CCAAAGCGACCGAAGCCAGA | 37  | 0 |
| UCP1   | TATATAGCTGGGCCGCTCCC | 158 | 0 |
| UCP1   | CTGTTTTTTGAACCGACCGC | 129 | 0 |
| UCP1   | CCGCTGGGACTTATATAGCT | 35  | 0 |
| UCP1   | GCACCGAGCGAGAATGGGAA | 46  | 0 |
| UCP1   | TCCGCTGGGACTTATATAGC | 36  | 0 |
| UCP1   | TGTTTTTTGAACCGACCGCC | 154 | 0 |
| UCP1   | CCCAGCTATATAAGTCCCAG | 31  | 0 |
| UCP1   | TATAAGTCCCAGCGGAAGAC | 118 | 0 |
| UCP1   | AAATCGGGTTTGCTGCCCGG | 122 | 0 |
| UCP1   | CAGAAATCGGGTTTGCTGCC | 133 | 0 |
| UCP2   | TGTCCTGGTCCCTAAACGCC | 0   | 0 |
| UCP2   | CAACGGCTGTTGTCGGTTGC | 75  | 0 |
| UCP2   | GCTGTAACCAATCGACAGCG | 52  | 0 |
| UCP2   | CTGACGCCTTTTTCATCCC  | 83  | 0 |
| UCP2   | TAATTGGCTGACCCGTCCTG | 467 | 0 |
| UCP2   | AATTAAAGGCGAACCAGGCC | 74  | 0 |
| UCP2   | CCAATCAGAACTGCAGCAAC | 278 | 0 |
| UCP2   | CTGGGATGAGAAAAGGCGTC | 0   | 0 |
| UCP2   | AAGGCGTCAGGAGATGGACC | 51  | 0 |
| UCP2   | GGCAACCGACAACAGCCGTT | 97  | 0 |
| UCP3   | GGAGTTTTTCCAGGGTGAGA | 1   | 0 |
| UCP3   | TGGAGTTTTTCCAGGGTGAG | 35  | 0 |

|      |                       |     |   |
|------|-----------------------|-----|---|
| UCP3 | TTTTCATCACCTCTCACCC   | 515 | 0 |
| UCP3 | TGGAAAACTCCATACACAT   | 36  | 0 |
| UCP3 | TTCCACAATCCTATGAGAT   | 53  | 0 |
| UCP3 | AATGTGTATGGAGTTTTTCC  | 79  | 0 |
| UCP3 | CCTAATAGTACCTATCTCAT  | 42  | 0 |
| UCP3 | CCTATGAGATAGGTACTATT  | 40  | 0 |
| UCP3 | ATGTGTATGGAGTTTTTCCA  | 115 | 0 |
| UCP3 | GTACCTATCTCATAGGATTG  | 46  | 0 |
| RHAG | AGGCCTGTGCAATAGATTGT  | 24  | 0 |
| RHAG | GCATAATTTTCCCAATGGG   | 74  | 0 |
| RHAG | TAAAATGCCCCACCCATTG   | 271 | 0 |
| RHAG | GATTAATGCCCCACCCAT    | 54  | 0 |
| RHAG | ACAAAGGACTGCTCTGTGTG  | 232 | 0 |
| RHAG | CAGAGCATAATTTTCCCAA   | 66  | 0 |
| RHAG | ATAGATTGTTGGCATCATCC  | 1   | 0 |
| RHAG | GCAATGAAATTGTGAGAACC  | 158 | 0 |
| RHAG | ATGCCAACAAATCTATTGCAC | 82  | 0 |
| RHAG | ATTGTGGTAGGCTTTGTAGA  | 131 | 0 |
| RHBG | CGCTGATCCTGGCACTGTTA  | 143 | 0 |
| RHBG | CCCACAGCTGTGCCCTATCA  | 78  | 0 |
| RHBG | TAAATGGCCCTTAAAGACCC  | 7   | 0 |
| RHBG | CAAGGTAGGGCCAAGACTTG  | 0   | 0 |
| RHBG | CCCTATCAGGGCAGAACACA  | 0   | 0 |
| RHBG | TAAAGACCCCGGTCTGGGCT  | 55  | 0 |
| RHBG | CTGTTACGGTGCCAGGTCTT  | 0   | 0 |
| RHBG | GCCCAGACCGGGTCTTTAA   | 31  | 0 |
| RHBG | GCCCTTAAAGACCCCGGTCT  | 38  | 0 |
| RHBG | TCCCACAGCTGTGCCCTATC  | 197 | 0 |
| RHCG | TGTGTGTCCCGTTGATACTG  | 0   | 0 |
| RHCG | AGAAAGGCCCCAGTATCAAC  | 86  | 0 |
| RHCG | CCGACGCGGGGAATCTTTTG  | 1   | 0 |
| RHCG | TCTGTGTGTCCCGTTGATAC  | 200 | 0 |
| RHCG | TCTTTTGGGGCCCTCGGCTT  | 0   | 0 |
| RHCG | CTGTGTGTCCCGTTGATACT  | 153 | 0 |
| RHCG | GAGAAAGGCCCCAGTATCAA  | 0   | 0 |
| RHCG | CCCAAAGATTCCCCGCGTC   | 52  | 0 |

|        |                       |     |   |
|--------|-----------------------|-----|---|
| RHCG   | AACGGGACACACAGAATTTG  | 118 | 0 |
| RHCG   | CCCCAAAAGATTCCCCGCGT  | 71  | 0 |
| MTCH1  | GCTGCCAGACGTCCCAATA   | 117 | 0 |
| MTCH1  | CAGACCATATTGGGGACGTC  | 72  | 0 |
| MTCH1  | GGAAGCGCCTCAGACCATAT  | 64  | 0 |
| MTCH1  | CGAGCTGAATCTCCTGCTGC  | 135 | 0 |
| MTCH1  | GAAGCGCCTCAGACCATATT  | 112 | 0 |
| MTCH1  | GACGTCCCAATATGGTCTG   | 343 | 0 |
| MTCH1  | GAAAACTCCCGAAGCCAGGG  | 0   | 0 |
| MTCH1  | ATGCGATCGGACAAAGAGGC  | 37  | 0 |
| MTCH1  | CAGAGAAAACCTCCCGAAGCC | 23  | 0 |
| MTCH1  | TGCGATCGGACAAAGAGGCT  | 123 | 0 |
| MTCH2  | CTTCTGTTCCGGACACTTG   | 36  | 0 |
| MTCH2  | GCAAGAGAAACCGTCATTCC  | 22  | 0 |
| MTCH2  | TCGCCCTTACCAGGAATGA   | 215 | 0 |
| MTCH2  | GAAACCGTCATTCTGGTGA   | 77  | 0 |
| MTCH2  | TCTCTGCACATGCGCTTCC   | 79  | 0 |
| MTCH2  | AAACCGTCATTCTGGTGAA   | 32  | 0 |
| MTCH2  | AAGAATGGGAGTGTCAGTGG  | 35  | 0 |
| MTCH2  | TGACCTTGCCTCTGCCGTCA  | 232 | 0 |
| MTCH2  | CAGAAGAATGGGAGTGTCAG  | 0   | 0 |
| MTCH2  | AGAAGAATGGGAGTGTCAGT  | 1   | 0 |
| FLVCR2 | AATATGAGGGGCAGTGCAAA  | 46  | 0 |
| FLVCR2 | GAAGGCAAGAGACTGGGT    | 0   | 0 |
| FLVCR2 | CGGCGCCACCTAAGTGTCT   | 193 | 0 |
| FLVCR2 | AGTGTCTGGGGAATTCAAG   | 38  | 0 |
| FLVCR2 | CCAGAACACTTAGGTGGCGC  | 88  | 0 |
| FLVCR2 | GGGAAGGCGGATCTTCTTGC  | 30  | 0 |
| FLVCR2 | GAATATGAGGGGCAGTGCAA  | 134 | 0 |
| FLVCR2 | CTTGCAGGGTCCGCTGATAG  | 269 | 0 |
| FLVCR2 | GGAATGCATCCCGCAAGCTG  | 106 | 0 |
| FLVCR2 | TGGGCATTACTTCGGGAAGG  | 0   | 0 |
| MFSD7  | CTGTGTGTTGAGCCCTATCA  | 35  | 0 |
| MFSD7  | TGTGTGTTGAGCCCTATCAT  | 127 | 0 |
| MFSD7  | CCTATCATGGGCTGTGCAGC  | 18  | 0 |
| MFSD7  | GCATGTGTATCAGGTGCGGG  | 120 | 0 |

|         |                      |     |   |
|---------|----------------------|-----|---|
| MFSD7   | GCGGGTGGTGTGTTTGTGCT | 77  | 0 |
| MFSD7   | CGTGCATGTGTATCAGGTGC | 46  | 0 |
| MFSD7   | CACACAATACACATGGGCAC | 331 | 0 |
| MFSD7   | CGGGTGGTGTGTTTGTGCTT | 143 | 0 |
| MFSD7   | CTCAACACACAGACACAGGT | 70  | 0 |
| MFSD7   | CAGCTGCACAGCCCATGATA | 52  | 0 |
| DIRC2   | TACCCATTCGCCTGCCAAT  | 189 | 0 |
| DIRC2   | TCACTGGAGATGGATCTTTG | 169 | 0 |
| DIRC2   | CTTTCTTCTCGTTTACCCTG | 0   | 0 |
| DIRC2   | GTTTAAGCGTAGTTGGTCCC | 57  | 0 |
| DIRC2   | TTAAGCGTAGTTGGTCCCAG | 105 | 0 |
| DIRC2   | TCGCCTATTGGCAGGCGAAA | 121 | 0 |
| DIRC2   | TTTATTGCTCGCCTATTGGC | 0   | 0 |
| DIRC2   | CGCCTATTGGCAGGCGAAAT | 0   | 0 |
| DIRC2   | TTTAAGCGTAGTTGGTCCCA | 43  | 0 |
| DIRC2   | TGCCAATAGGCGAGCAATAA | 127 | 0 |
| ATP13A3 | GATGGAGTCCAAACAGCTTG | 106 | 0 |
| ATP13A3 | TACAGGTAATCTCATGGTGG | 117 | 0 |
| ATP13A3 | CTGCAGAACCTCAAGCTGTT | 0   | 0 |
| ATP13A3 | TCACCTCGGGACTTCCACAC | 147 | 0 |
| ATP13A3 | CTCATGGTGGAGGTGTATTC | 80  | 0 |
| ATP13A3 | CAGAGATGCCTCACTGTGAT | 44  | 0 |
| ATP13A3 | CTGTTTGGACTCCATCTTCT | 321 | 0 |
| ATP13A3 | AGTGAGGCATCTCTGCTCTG | 98  | 0 |
| ATP13A3 | ACTGATTGCCAGCTCCAGTG | 129 | 0 |
| ATP13A3 | GTGTGGAAGTCCCGAGGTGA | 80  | 0 |
| SLN     | TGCAGTCTTGCATAACAGGT | 97  | 0 |
| SLN     | GCTCATGAACAAGTACTGTC | 84  | 0 |
| SLN     | AGGCGTCACCTACCAATCC  | 43  | 0 |
| SLN     | GGTATGCAGTCTTGCATAAC | 62  | 0 |
| SLN     | ACCCATCTTAAGTCCTGGAT | 197 | 0 |
| SLN     | TCTTAAGTCCTGGATTGGTG | 104 | 0 |
| SLN     | ATGCAGTCTTGCATAACAGG | 32  | 0 |
| SLN     | TGAGCCACCCCAAAGTTGC  | 0   | 0 |
| SLN     | CACCAATCCAGGACTTAAGA | 158 | 0 |
| SLN     | ATTCAGCAACTTTGGGGG   | 83  | 0 |

|       |                      |     |   |
|-------|----------------------|-----|---|
| ASNA1 | ATAGGTCCCCGGGCTGATAG | 25  | 0 |
| ASNA1 | ACTCTAAGCCACTATCAGCC | 88  | 0 |
| ASNA1 | GGACCTACCGTGAAGAATAG | 78  | 0 |
| ASNA1 | CTAACTTCACCGAAAGGGCA | 66  | 0 |
| ASNA1 | TCTAAGCCACTATCAGCCCG | 1   | 0 |
| ASNA1 | GACCTACCGTGAAGAATAGA | 89  | 0 |
| ASNA1 | GTAGGTCCCAACCTCACCTC | 205 | 0 |
| ASNA1 | TCACCGAAAGGGCATGGACT | 114 | 0 |
| ASNA1 | TTCACCGAAAGGGCATGGAC | 125 | 0 |
| ASNA1 | CGCCCCCTCTGTTATTCAAT | 120 | 0 |
| MMGT1 | GGCCTACGGGAGGATGGGTG | 103 | 0 |
| MMGT1 | CCACTCGACCGCACCCACCA | 74  | 0 |
| MMGT1 | CACGAGGGTGGGTGTAGCCG | 109 | 0 |
| MMGT1 | CGAGGGTGGGTGTAGCCGAG | 0   | 0 |
| MMGT1 | GGAGGATGGGTGGGGCGTAG | 69  | 0 |
| MMGT1 | ACGAGGGTGGGTGTAGCCGA | 121 | 0 |
| MMGT1 | TGGTGGGTGCGGTGAGTGG  | 161 | 0 |
| MMGT1 | GAGAGTGGGTGAGGGCCGAG | 33  | 0 |
| MMGT1 | GAGGGGACGGAGAGTGGGTG | 81  | 0 |
| MMGT1 | CGGCTACACCCACCCTCGTG | 144 | 0 |
| MAGT1 | CTTTTTCTATTGCGCGACC  | 138 | 0 |
| MAGT1 | TTTACGTATCGAGAAAGGGG | 20  | 0 |
| MAGT1 | AAATGGGACCTAGCCGCGTG | 112 | 0 |
| MAGT1 | TTACGTATCGAGAAAGGGGC | 0   | 0 |
| MAGT1 | AATAGCTCTTATCCCTCACG | 86  | 0 |
| MAGT1 | CATGAAGGCGGCGAATTTCA | 29  | 0 |
| MAGT1 | CACAACTGCGCATGCGTGCT | 0   | 0 |
| MAGT1 | CTCTTATCCCTCAGCGGCT  | 203 | 0 |
| MAGT1 | TTTTTTCTATTGCGCGACCG | 33  | 0 |
| MAGT1 | AATGGGACCTAGCCGCGTGA | 301 | 0 |
| MFSD1 | CGTTCCTCCAGCATTTATG  | 147 | 0 |
| MFSD1 | TGCAGACGCTGTGCACCGAA | 21  | 0 |
| MFSD1 | GCACAGCGTCTGCAGAAATC | 49  | 0 |
| MFSD1 | GCTTTGGGAAATTGAGGAAC | 52  | 0 |
| MFSD1 | CACGCCCTGGGATACTTCAG | 145 | 0 |
| MFSD1 | TCTTGACTGCTCCCACACCT | 130 | 0 |

|        |                      |     |   |
|--------|----------------------|-----|---|
| MFSD1  | CCACGCCCTGGGATACTTCA | 211 | 0 |
| MFSD1  | AAGCATCTCTTTCCCAGGTG | 57  | 0 |
| MFSD1  | CTCTTGACTGCTCCCACACC | 186 | 0 |
| MFSD1  | GAAGTATCCCAGGGCGTGGA | 19  | 0 |
| MFSD10 | AGACCAGGGTGAGCACATCG | 105 | 0 |
| MFSD10 | GCAACGGTCCTGAGAGACCA | 34  | 0 |
| MFSD10 | GAGAGAAAACCTGAAGCCGC | 0   | 0 |
| MFSD10 | CAGCAGGAAACGCAGGCTTC | 72  | 0 |
| MFSD10 | AGTTTTCTCTCGCTGTTACG | 121 | 0 |
| MFSD10 | AGAGAAAACCTGAAGCCGCG | 155 | 0 |
| MFSD10 | CGTTTCCTGCTGCCTGGGTT | 63  | 0 |
| MFSD10 | CGAGAGAAAACCTGAAGCCG | 0   | 0 |
| MFSD10 | GAGCACCTAAAGGGGCTGA  | 0   | 0 |
| MFSD10 | CCCTAAAGGGGCTGATGGCA | 153 | 0 |
| MFSD11 | CCACAGAACTGGTCCCTGG  | 105 | 0 |
| MFSD11 | TACAGGTATTGCACTGGGTG | 23  | 0 |
| MFSD11 | GTATTGCACTGGGTGGGGAA | 49  | 0 |
| MFSD11 | CCTCCAGGGACCAGTTTCTG | 81  | 0 |
| MFSD11 | CAGTTTCTGTGGGCGTGAT  | 0   | 0 |
| MFSD11 | ACTGATTTGGCTGATCCTCC | 151 | 0 |
| MFSD11 | TTACAGGTATTGCACTGGGT | 41  | 0 |
| MFSD11 | CTGTGGGCGTGATTGGAGC  | 56  | 0 |
| MFSD11 | GTTACAGGTATTGCACTGGG | 174 | 0 |
| MFSD11 | CAATACACGCCACAGAAAC  | 36  | 0 |
| MFSD12 | ATCTGCTCACCTTGGGCAGG | 209 | 0 |
| MFSD12 | TGCCCAAGGTGAGCAGATTG | 55  | 0 |
| MFSD12 | ATTGGTAGTGACTGCCCAGT | 29  | 0 |
| MFSD12 | CAGGCATGCCGTGTCAGTCA | 71  | 0 |
| MFSD12 | ATGTACAGTATGCCACCTG  | 53  | 0 |
| MFSD12 | TGTACAGTATGCCACCTGT  | 116 | 0 |
| MFSD12 | TTGGTAGTGACTGCCCAGTG | 187 | 0 |
| MFSD12 | GAGCGAGTAGGTGAGGTACA | 148 | 0 |
| MFSD12 | CATTGGTAGTGACTGCCCAG | 105 | 0 |
| MFSD12 | TTGATGAGTGACGTTTGCCC | 80  | 0 |
| MFSD2A | GGGCTGGGCAGAACTATAAG | 55  | 0 |
| MFSD2A | GGCAGATCACTTCAGCCTG  | 45  | 0 |

|        |                      |     |   |
|--------|----------------------|-----|---|
| MFSD2A | ACCCATGACTTCTGAGCCCC | 132 | 0 |
| MFSD2A | GGCTGAAAGTGATCTGCCCC | 18  | 0 |
| MFSD2A | GCTCAGAAGTCATGGGTGGT | 27  | 0 |
| MFSD2A | CTCCTAGCAATCCGAGAAGC | 40  | 0 |
| MFSD2A | CCCAGGCCTAGGAAAGGTAG | 29  | 0 |
| MFSD2A | TCAGAGCCCCTACCTTTCCT | 78  | 0 |
| MFSD2A | GCCTGGGGCTCAGAAGTCAT | 191 | 0 |
| MFSD2A | ATAGTTCTGCCAGCCCTCT  | 158 | 0 |
| MFSD2B | CCTCAGGACCGTTCTCCTTG | 167 | 0 |
| MFSD2B | CAGCGAAGAACCAAAATCCG | 44  | 0 |
| MFSD2B | GCCTCTTGCTTCATTTTGCA | 68  | 0 |
| MFSD2B | GAAGAACCAAAATCCGCGGG | 25  | 0 |
| MFSD2B | CATGGTCCAGCCTGAACGAG | 74  | 0 |
| MFSD2B | GGAAACGCAGAAACCGCGAA | 0   | 0 |
| MFSD2B | CGTTGGGCATCATGTGTAGC | 31  | 0 |
| MFSD2B | ATGGTCCAGCCTGAACGAGC | 255 | 0 |
| MFSD2B | AGCGAAGAACCAAAATCCGC | 39  | 0 |
| MFSD2B | CCCTCAGGACCGTTCTCCTT | 180 | 0 |
| MFSD3  | GCGGTATCGCAGAGCATGGT | 67  | 0 |
| MFSD3  | CTCTGCGATACCGCAGGTGA | 31  | 0 |
| MFSD3  | TCTGCGATACCGCAGGTGAG | 37  | 0 |
| MFSD3  | ACCTGCGGTATCGCAGAGCA | 48  | 0 |
| MFSD3  | ACCATGCTCTGCGATACCGC | 0   | 0 |
| MFSD3  | TGCGGTATCGCAGAGCATGG | 39  | 0 |
| MFSD3  | CCGAGAACTGCTGAGAGTC  | 5   | 0 |
| MFSD3  | CCGGACTCTCAGCAGTTTCT | 35  | 0 |
| MFSD3  | TGCGAGGCCGCAGGTAAAGA | 122 | 0 |
| MFSD3  | AAACTGCTGAGAGTCCGGCC | 75  | 0 |
| MFSD5  | GGGGAACCACGTGGATATCT | 196 | 0 |
| MFSD5  | AATGTCACCTGATCTTGGCT | 94  | 0 |
| MFSD5  | AAATGTCACCTGATCTTGGC | 232 | 0 |
| MFSD5  | AACAGAGAACTGGAGGAGGT | 0   | 0 |
| MFSD5  | TTTGAACAGAGAACTGGAGG | 0   | 0 |
| MFSD5  | TCTTCTCCAAGATATCCACG | 160 | 0 |
| MFSD5  | ACAGAGAACTGGAGGAGGTG | 34  | 0 |
| MFSD5  | AGAGAACTGGAGGAGGTGGG | 83  | 0 |



|        |                       |     |   |
|--------|-----------------------|-----|---|
| MFSD5  | GAACAGAGAACTGGAGGAGG  | 46  | 0 |
| MFSD5  | CAGAGAACTGGAGGAGGTGG  | 0   | 0 |
| MFSD6  | TACCGGCTGGACCCGTTTCA  | 387 | 0 |
| MFSD6  | GCTGAGGAGGCGAAAGCACT  | 39  | 0 |
| MFSD6  | AAGTCGCTTGGGGGTGCGGG  | 0   | 0 |
| MFSD6  | AGGAGCCGCAGCGGGAGAGA  | 20  | 0 |
| MFSD6  | CTACCGGCTGGACCCGTTTC  | 241 | 0 |
| MFSD6  | GTCCAGCCGGTAGTGACCGG  | 3   | 0 |
| MFSD6  | CTCAGCGCCCGGCCCTGAAA  | 0   | 0 |
| MFSD6  | GGCTGGACCCGTTTCAGGGC  | 0   | 0 |
| MFSD6  | ATGCGTCGACTGCCCCGCTCC | 173 | 0 |
| MFSD6  | GGAGGCGAAAGCACTGGGCG  | 112 | 0 |
| MFSD6L | AAACCGTCAGAGTCGGCGTG  | 148 | 0 |
| MFSD6L | TGTAGGGTGCCTCTGAGCT   | 181 | 0 |
| MFSD6L | TGGGATTTGCGATGTCAGAG  | 0   | 0 |
| MFSD6L | TAAAACCGTCAGAGTCGGCG  | 0   | 0 |
| MFSD6L | CATCTTCTCAGGTCTGTAC   | 189 | 0 |
| MFSD6L | TGGAATGAATGGTATCCACC  | 154 | 0 |
| MFSD6L | TCTGTGGTTGGTCACTGATC  | 183 | 0 |
| MFSD6L | GGCGTTTAGCTCAGGCTCCT  | 89  | 0 |
| MFSD6L | GCAGTCCAGGCGTTTAGCTC  | 35  | 0 |
| MFSD6L | AAAACCGTCAGAGTCGGCGT  | 74  | 0 |
| MFSD8  | TGCAAAGGCGCCTTACCTGG  | 108 | 0 |
| MFSD8  | AGCCACCTCTACCTTTCACG  | 382 | 0 |
| MFSD8  | TCTACCTTTCACGGGGGGAA  | 222 | 0 |
| MFSD8  | CCACCTCTACCTTTCACGGG  | 165 | 0 |
| MFSD8  | GCTTGTAACCTGCAGGTCCC  | 165 | 0 |
| MFSD8  | CTCTACCTTTCACGGGGGGA  | 28  | 0 |
| MFSD8  | AACTCCCACGTTTCAGCAGC  | 129 | 0 |
| MFSD8  | TCAGAGCCAGGACTGAAGGT  | 99  | 0 |
| MFSD8  | TCGGAGGGCTGAGATAATGG  | 32  | 0 |
| MFSD8  | GCTTCGGAGGGCTGAGATAA  | 161 | 0 |
| MFSD9  | GGGCGCTGTGTTAGCCTTAG  | 34  | 0 |
| MFSD9  | CCATGATGAAAAGGGCACTT  | 40  | 0 |
| MFSD9  | CTAAACAAGCGACACTCTAG  | 71  | 0 |
| MFSD9  | AGACTGCCCCACGCCAATAA  | 243 | 0 |

|        |                       |     |   |
|--------|-----------------------|-----|---|
| MFSD9  | CCAAAGTGCCCTTTTCATCA  | 162 | 0 |
| MFSD9  | AGCGACTCTAGTGGTGAT    | 70  | 0 |
| MFSD9  | AATAAGGGTGCCGCTGGCCT  | 155 | 0 |
| MFSD9  | ATCATCGCCCCTCCTCTC    | 108 | 0 |
| MFSD9  | CATCATCGCCCCTCCTCT    | 152 | 0 |
| MFSD9  | GGACAACCTGCACCCATGGTG | 58  | 0 |
| NIPA1  | GGGTGAGTCCAACCACTTAC  | 193 | 0 |
| NIPA1  | AACCACTTACCGGGTCCCCT  | 47  | 0 |
| NIPA1  | CAAATCCTAGGTGGAGTTGA  | 80  | 0 |
| NIPA1  | AAGTACCCTCAACTCCACCT  | 269 | 0 |
| NIPA1  | TCAAATCCTAGGTGGAGTTG  | 135 | 0 |
| NIPA1  | CTCCACTAGGATTTGACCA   | 122 | 0 |
| NIPA1  | GGTGAGTCCAACCACTTACC  | 140 | 0 |
| NIPA1  | AGAGCACAAGAGGGCGGACA  | 40  | 0 |
| NIPA1  | GGACTGCATTCTGCAGAA    | 163 | 0 |
| NIPA1  | AGGACTGCATTCTGCAGA    | 51  | 0 |
| NIPA2  | CTGGGGCCTTGTAAGGAAC   | 76  | 0 |
| NIPA2  | AGCCGACTGGGGCCTTGTA   | 171 | 0 |
| NIPA2  | CAGTACAGTATGCTGCCAGG  | 104 | 0 |
| NIPA2  | TAAAACGAGGATTCCGGGCC  | 36  | 0 |
| NIPA2  | CGTGGCCCTTATTTAAAACG  | 46  | 0 |
| NIPA2  | AAGCAGTACAGTATGCTGCC  | 104 | 0 |
| NIPA2  | GTTTTAAATAAGGGCCACGC  | 76  | 0 |
| NIPA2  | TAAAGGAACCGGAACCCGGC  | 0   | 0 |
| NIPA2  | CGGGTTCCGGTTCCTTTACA  | 170 | 0 |
| NIPA2  | CTTGTAAGGAACCGGAACC   | 41  | 0 |
| NIPAL1 | CGATAACAACTCCCGAACG   | 39  | 0 |
| NIPAL1 | CACTGCTTTTCCCCTCGTTC  | 39  | 0 |
| NIPAL1 | GCTGCTCTTTTCGGCACTCT  | 42  | 0 |
| NIPAL1 | TCGTTCCGGGAGTTTGTTATC | 103 | 0 |
| NIPAL1 | CTCGTTCGGGAGTTTGTTAT  | 55  | 0 |
| NIPAL1 | TCACTGCTTTTCCCCTCGTT  | 233 | 0 |
| NIPAL1 | TGCGGTAGTCTGCAGGGCTT  | 0   | 0 |
| NIPAL1 | TTTCGGGTGGCTGCTTTTT   | 107 | 0 |
| NIPAL1 | CACTTCTCCAGCCTTTCGGG  | 196 | 0 |
| NIPAL1 | TGACTAGTAACTGCCTTAGG  | 227 | 0 |

|        |                       |     |   |
|--------|-----------------------|-----|---|
| NIPAL4 | ATCAATGAACGGGTAAGGCA  | 147 | 0 |
| NIPAL4 | AAGGAACCCAGGTCCCAAT   | 31  | 0 |
| NIPAL4 | CATCCCAGGGAAAGAGTAC   | 0   | 0 |
| NIPAL4 | GAGGTGGAAGTGGCAACATA  | 50  | 0 |
| NIPAL4 | CTGCTGCCAATTGGGAACCT  | 149 | 0 |
| NIPAL4 | GGAAGTGGCAACATAGGGGT  | 0   | 0 |
| NIPAL4 | CCCGTTCATTGATTCAACCC  | 3   | 0 |
| NIPAL4 | CGAGGTGGAAGTGGCAACAT  | 113 | 0 |
| NIPAL4 | TACCAGCACAGATCAGACCT  | 64  | 0 |
| NIPAL4 | AGGTGGAAGTGGCAACATAG  | 22  | 0 |
| ATP5L2 | AAGTGAACCACTCAGGGTCC  | 28  | 0 |
| ATP5L2 | CTTGATAAGTGAACCACTC   | 0   | 0 |
| ATP5L2 | TCCTGTTCTCACGTTGAGA   | 83  | 0 |
| ATP5L2 | AACCACTCAGGGTCCTGGCC  | 40  | 0 |
| ATP5L2 | CTGAGTGGTTCACCTTATACA | 99  | 0 |
| ATP5L2 | GCCTTCTCAACGTGAGAACA  | 107 | 0 |
| ATP5L2 | TTCTCACGTTGAGAAGGCTG  | 86  | 0 |
| ATP5L2 | GAACCACTCAGGGTCCTGGC  | 0   | 0 |
| ATP5L2 | GCTGTCTCGGGTGACAGAAG  | 41  | 0 |
| ATP5L2 | AAGGCTGAGGAGGAGGCAGG  | 0   | 0 |
